# Supplementary material for: Direct synthesis of N-functionalized indoles through isomerization of azomethine ylides
Source: Royal Society of Chemistry journal article supplement (doi:10.1039/d3ob01393f), 2024-01-01

# Direct synthesis of N-functionalized indoles through isomerization of azomethine ylides

Jun-Rong Song<sup>a, b</sup> Xiong-Jiang Li,<sup>a, b</sup> Jun Shi,<sup>a, b</sup> Wei Wu<sup>a, b</sup>\* and Hai Ren<sup>a, b</sup>\*

State Key Laboratory of Functions and Applications of Medicinal Plants, Guizhou Medical University, Guiyang 550014, China; The Key Laboratory of Chemistry for Natural Products of Guizhou Province and Chinese Academy of Sciences, Guiyang 550014, China

**Email:** [wuwei@gmc.edu.cn](mailto:wuwei@gmc.edu.cn); [renhai@gmc.edu.cn](mailto:renhai@gmc.edu.cn)

## Supporting Information

### Content

|                                                                         |    |
|-------------------------------------------------------------------------|----|
| 1. General information.....                                             | 2  |
| 2. Optimization of the Reaction Conditions.....                         | 3  |
| 3. Mechanistic Studies.....                                             | 5  |
| 4. Experimental procedures and characterizations.....                   | 6  |
| 5. Scale-up experiments.....                                            | 16 |
| 6. Transformations and applications.....                                | 17 |
| 7. References.....                                                      | 19 |
| 8. <sup>1</sup> H NMR and <sup>13</sup> C NMR spectra of compounds..... | 20 |

## 1. General information

All solvents and reagents were obtained from commercial sources and were purified according to standard procedures before use (unless stated otherwise). Column chromatography was performed on silica gel (Qingdao, 300 - 400 mesh) using the indicated eluents.  $^1\text{H}$  and  $^{13}\text{C}$  NMR data were collected on a Varian Mercury 400 MHz or Agilent Mercury 600 MHz NMR spectrometer at room temperature using chloroform-*d*, DMSO-*d*<sub>6</sub> or Acetone-*d*<sub>6</sub> as a solvent and TMS as an internal standard, and chemical shift ( $\delta$ ) was expressed in parts per million (ppm).  $^1\text{H}$  and  $^{13}\text{C}$  NMR spectra were internally referenced to the proton ( $^1\text{H}$ ) of the internal TMS signal at 0.00 ppm, the solvent residue of DMSO-*d*<sub>6</sub> at 2.50 ppm or Acetone-*d*<sub>6</sub> at 2.05 ppm and the residual carbon nuclei ( $^{13}\text{C}$ ) of the solvent at 77.0 or 39.5 ppm, respectively. The following abbreviations were used in expressing the multiplicity: s = singlet, brs = broad singlet, d = doublet, t = triplet, q = quartet, m = multiplet. High resolution mass spectra (HRMS-ESI) were recorded on a Bruker ESI-QTOF mass spectrometer. Infrared (IR) spectra were recorded using a Fourier transform infrared spectrometer (IR 200) and the KBr disk method was adopted. The course of the reactions was monitored by thin-layer chromatography (TLC). All reactions that need to be heated were carried out in an oil bath.

## 2. Optimization of the Reaction Conditions

### 2.1 Screening of solvents <sup>a</sup>

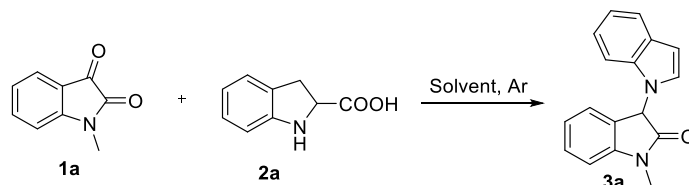

**Table S1**

| Entry | Solvent                     | T (°C) | <i>t</i> (h) | Yield (%) |
|-------|-----------------------------|--------|--------------|-----------|
| 1     | DMF                         | 50     | 72           | Trace     |
| 2     | H <sub>2</sub> O            | 50     | 72           | Trace     |
| 3     | THF                         | 50     | 48           | 17        |
| 4     | DCM                         | 50     | 72           | 38        |
| 5     | TFE                         | 50     | 48           | 35        |
| 6     | EtOH                        | 50     | 22           | 86        |
| 7     | <sup>i</sup> PrOH           | 50     | 24           | 79        |
| 8     | <sup>t</sup> BuOH           | 50     | 24           | 82        |
| 9     | DMF/EtOH (1/1)              | 50     | 72           | 21        |
| 10    | H <sub>2</sub> O/EtOH (1/1) | 50     | 72           | 63        |
| 11    | DCM/EtOH (1/1)              | 50     | 72           | 54        |
| 12    | THF/EtOH (1/1)              | 50     | 72           | 28        |

<sup>a</sup> Unless noted otherwise, reactions were carried out with **1a** (0.20 mmol), **2a** (0.20 mmol), solvent (2.0 mL) and reaction carried out under Ar atmosphere, yields were isolated yields.

## 2.2 Screening of reaction temperature <sup>a</sup>

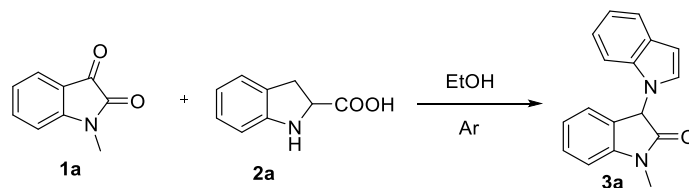

**Table S2**

| Entry | Solvent | T (°C) | <i>t</i> (h) | Yield (%) |
|-------|---------|--------|--------------|-----------|
| 1     | EtOH    | 25     | 22           | 20        |
| 2     | EtOH    | 40     | 22           | 55        |
| 3     | EtOH    | 50     | 22           | 86        |
| 4     | EtOH    | 60     | 22           | 74        |
| 5     | EtOH    | 70     | 22           | 74        |

<sup>a</sup> Unless noted otherwise, reactions were carried out with **1a** (0.20 mmol), **2a** (0.20 mmol), EtOH (2.0 mL) and reaction carried out under Ar atmosphere, yields were isolated yields.

### 3. Mechanistic Studies

#### 3.1 Isotopic experiment using CD<sub>3</sub>OD

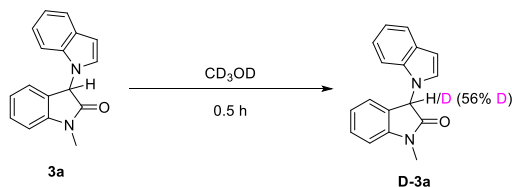

The **3a** was dissolved in 0.6 mL **CD<sub>3</sub>OD**, and after 0.5 hour, the mixture was scanned by <sup>1</sup>H NMR. **3-(1H-indol-1-yl)-1-methylindolin-2-one-3-d (D-3a)**

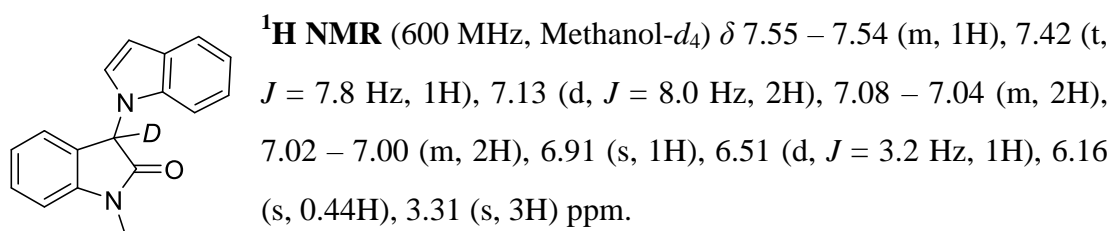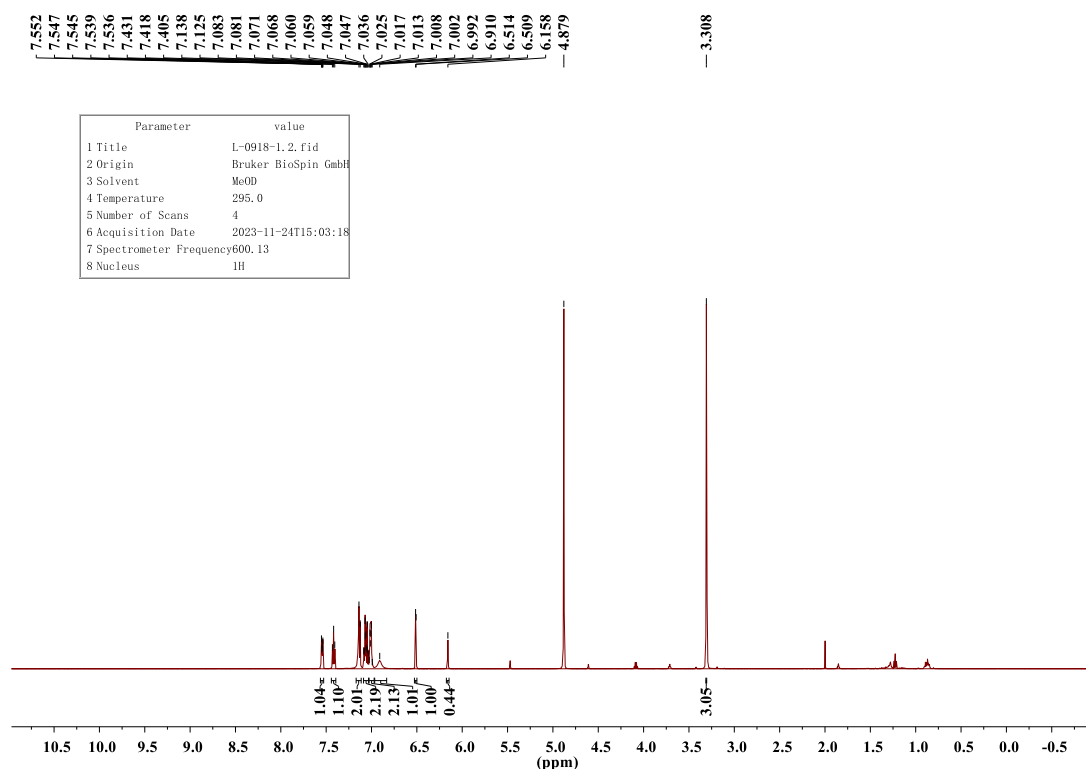

## 4. Experimental procedures and characterizations

### 4.1 Procedure for 3-(1H-indol-1-yl)-1-methylindolin-2-one

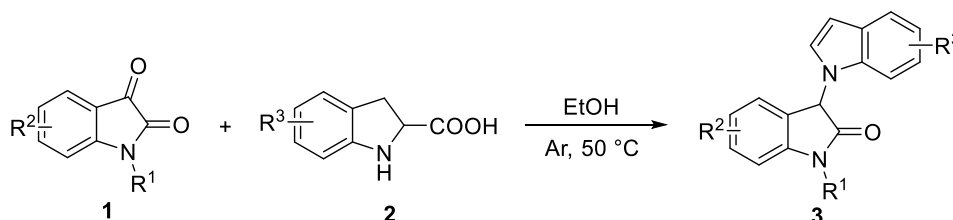

A mixture of **1** (0.2 mmol) and **2** (0.2 mmol) were added in a dried Schlenk tube, then EtOH (2 mL) was added under Ar atmosphere, and the reaction system was stirred at 50 °C. The reaction was monitored by TLC until 1-methylindoline-2,3-dione was fully consumed. The reaction was extracted with DCM. The combined organic portions were washed with water and brine, dried (Na<sub>2</sub>SO<sub>4</sub>), filtered, and purified by flash column chromatography (Petroleum ether/Ethyl acetate = 10/1) to afford 2-oxindole **3**.

#### 3-(1H-indol-1-yl)-1-methylindolin-2-one (3a)

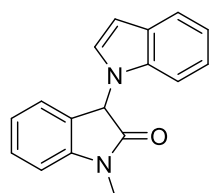

Yellow solid, 22 h, 45.1 mg, 86% yield; <sup>1</sup>H NMR (600 MHz, Acetone-*d*<sub>6</sub>) δ 7.59-7.58 (m, 1H), 7.44-7.42 (m, 1H), 7.24 (d, *J* = 3.0 Hz, 1H), 7.15-7.11 (m, 2H), 7.06-7.03 (m, 4H), 6.52 (d, *J* = 3.3 Hz, 1H), 6.20 (s, 1H), 3.30 (s, 3H) ppm. All analytical datas are consistent with literature <sup>[1]</sup>.

#### 3-(1H-indol-1-yl)-5-methoxy-1-methylindolin-2-one (3b)

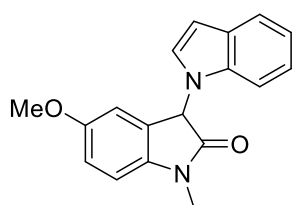

Yellow solid, mp 155 – 156 °C, 69 h, 30.9 mg, 53% yield; <sup>1</sup>H NMR (600 MHz, Chloroform-*d*) δ 7.64 (d, *J* = 7.2 Hz, 1H), 7.16 – 7.10 (m, 3H), 7.02 (d, *J* = 3.2 Hz, 1H), 6.93 (dd, *J* = 8.6, 2.4 Hz, 1H), 6.88 (d, *J* = 8.4 Hz, 1H), 6.78 (d, *J* = 1.2 Hz, 1H), 6.58 (d, *J* = 3.2 Hz, 1H), 5.85 (s, 1H), 3.70 (s, 3H), 3.29 (s, 3H) ppm. IR (KBr): 3212, 1719, 1620, 1470, 1330, 1207, 908, 716 cm<sup>-1</sup>. <sup>13</sup>C NMR (150 MHz, Chloroform-*d*) δ 172.2, 156.5, 137.2, 136.2, 129.1, 127.0, 125.8, 122.1, 121.2, 120.1,

114.8, 111.8, 109.6, 109.2, 103.1, 58.7, 55.8, 26.7 ppm. **HRMS-ESI**: Exact mass calcd. for  $C_{18}H_{16}N_2O_2Na^+$  [ $M + Na$ ] $^+$ : 315.1104, Found: 315.1107.

### 3-(1H-indol-1-yl)-1,5-dimethylindolin-2-one (3c)

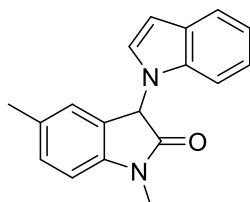

Yellow solid, mp 117 – 118 °C, 45 h, 43.6 mg, 79% yield;  $^1H$  **NMR** (600 MHz, Acetone- $d_6$ )  $\delta$  7.58 – 7.56 (m, 1H), 7.23 – 7.22 (m, 2H), 7.03 – 7.01 (m, 4H), 6.93 (s, 1H), 6.51 (d,  $J = 3.2$  Hz, 1H), 6.14 (s, 1H), 3.27 (s, 3H), 2.22 (s, 3H) ppm.  $^{13}C$  **NMR** (150 MHz, Chloroform- $d$ )  $\delta$  172.4, 141.4, 136.2, 133.0, 130.3, 129.1, 127.0, 125.7, 124.7, 122.1, 121.2, 120.0, 109.6, 108.5, 103.0, 58.5, 26.6, 21.0 ppm. **IR (KBr)**: 3569, 2927, 1719, 1648, 1460, 1330, 1207, 908, 779, 669  $cm^{-1}$ . **HRMS-ESI**: Exact mass calcd. for  $C_{18}H_{16}N_2ONa^+$  [ $M + Na$ ] $^+$ : 299.1154, Found: 299.1160.

### 5-fluoro-3-(1H-indol-1-yl)-1-methylindolin-2-one (3d)

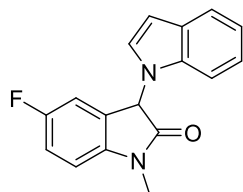

Yellow solid, mp 165 – 167 °C, 47 h, 43.4 mg, 77% yield;  $^1H$  **NMR** (600 MHz, Chloroform- $d$ )  $\delta$  7.65 – 7.64 (m, 1H), 7.17 – 7.10 (m, 3H), 7.04 (s, 1H), 7.00 (d,  $J = 3.6$  Hz, 1H), 6.93 – 6.89 (m, 2H), 6.59 (d,  $J = 3.2$ , 1H), 5.86 (s, 1H), 3.31 (s, 3H) ppm.  $^{13}C$  **NMR** (150 MHz, Chloroform- $d$ )  $\delta$  172.1, 159.5 (d,  $^1J = 243.0$  Hz), 139.8 (d,  $^4J = 2.4$  Hz), 136.1, 129.2, 126.8, 126.2 (d,  $^3J = 8.0$  Hz), 122.3, 121.3, 120.2, 116.5 (d,  $^2J = 24.0$  Hz), 113.2 (d,  $^2J = 25.3$  Hz), 109.4, 109.3, 103.4, 58.5, 26.8 ppm.  $^{19}F$  **NMR** (564 MHz, Chloroform- $d$ )  $\delta$  -119.0 ppm, **IR (KBr)**: 3070, 2925, 1716, 1648, 1363, 1325, 1515, 920, 870, 690  $cm^{-1}$ . **HRMS-ESI**: Exact mass calcd. for  $C_{17}H_{13}N_2OFNa^+$  [ $M + Na$ ] $^+$ : 303.0910, Found: 303.0943.

### 5-chloro-3-(1H-indol-1-yl)-1-methylindolin-2-one (3e)

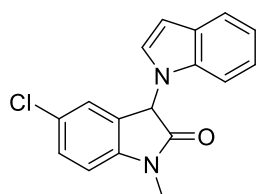

Yellow solid, mp 157 – 158 °C, 42 h, 32.8 mg, 55% yield;  $^1H$  **NMR** (600 MHz, Chloroform- $d$ )  $\delta$  7.65 – 7.64 (m, 1H), 7.39 – 7.37 (m, 1H), 7.17 – 7.12 (m, 3H), 7.04 (s, 1H), 7.00 (s, 1H), 6.91 (d,  $J = 8.4$  Hz, 1H), 6.59 (d,  $J = 3.2$  Hz, 1H), 5.86 (s, 1H), 3.31 (s, 3H) ppm.  $^{13}C$  **NMR** (150 MHz, Chloroform- $d$ )  $\delta$  172.0, 142.3, 136.1, 130.1,

129.2, 128.8, 126.8, 126.3, 125.4, 122.4, 121.3, 120.3, 109.7, 109.4, 103.5, 58.2, 26.7 ppm. **IR (KBr)**: 3066, 2346, 1735, 1684, 1490, 1364, 1262, 881, 746, 670  $\text{cm}^{-1}$ . **HRMS-ESI**: Exact mass calcd. for  $\text{C}_{17}\text{H}_{13}\text{N}_2\text{OCiNa}^+$  [ $\text{M} + \text{Na}$ ] $^+$ : 319.0609; Found: 319.0612.

### 5-bromo-3-(1H-indol-1-yl)-1-methylindolin-2-one (3f)

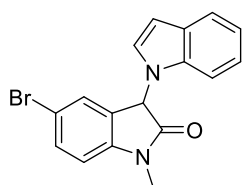

Yellow solid, mp 180 – 181  $^{\circ}\text{C}$ , 47 h, 57.1 mg, 84% yield;  $^1\text{H}$  **NMR** (600 MHz, Chloroform-*d*)  $\delta$  7.68 (dd,  $J = 6.6, 1.2$  Hz, 1H), 7.55 (dd,  $J = 8.4, 1.2$  Hz, 1H), 7.31 (s, 1H), 7.22 – 7.14 (m, 2H), 7.07 (s, 1H), 7.03 (d,  $J = 1.8$  Hz, 1H), 6.86 (d,  $J = 8.3$  Hz, 1H), 6.63 (d,  $J = 3.0$  Hz, 1H), 5.88 (s, 1H), 3.32 (s, 3H) ppm.  $^{13}\text{C}$  **NMR** (150 MHz, Chloroform-*d*)  $\delta$  171.8, 142.7, 136.0, 133.0, 129.1, 128.0, 126.8, 126.5, 122.3, 121.3, 120.2, 115.9, 110.2, 109.3, 103.4, 58.1, 26.7 ppm. **IR (KBr)**: 3226, 1735, 1612, 1490, 1364, 1328, 1103, 746, 670  $\text{cm}^{-1}$ . **HRMS-ESI**: Exact mass calcd. for  $\text{C}_{17}\text{H}_{13}\text{N}_2\text{OBrNa}^+$  [ $\text{M} + \text{Na}$ ] $^+$ : 363.0103; Found: 363.0109.

### 6-chloro-3-(1H-indol-1-yl)-1-methylindolin-2-one (3g)

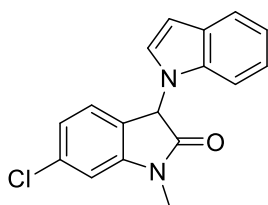

Yellow solid, mp 153 – 155  $^{\circ}\text{C}$ , 40 h, 45.0 mg, 76% yield;  $^1\text{H}$  **NMR** (600 MHz, Chloroform-*d*)  $\delta$  7.64 (d,  $J = 7.2$  Hz, 1H), 7.18 – 7.10 (m, 2H), 7.08 (d,  $J = 7.8$  Hz, 1H), 7.04 – 7.03 (m, 2H), 6.98 (d,  $J = 1.8$  Hz, 2H), 6.58 (d,  $J = 3.2$  Hz, 1H), 5.84 (s, 1H), 3.30 (s, 3H) ppm.  $^{13}\text{C}$  **NMR** (150 MHz, Chloroform-*d*)  $\delta$  172.4, 145.0, 136.1, 136.1, 129.2, 126.8, 125.9, 123.2, 122.9, 122.3, 121.3, 120.2, 109.6, 109.5, 103.3, 58.0, 26.7 ppm. **IR (KBr)**: 1735, 1612, 1535, 1459, 1305, 1200, 1115, 739, 652  $\text{cm}^{-1}$ . **HRMS-ESI**: Exact mass calcd. for  $\text{C}_{17}\text{H}_{13}\text{N}_2\text{OCiNa}^+$  [ $\text{M} + \text{Na}$ ] $^+$ : 319.0614; Found: 319.0619.

### 6-bromo-3-(1H-indol-1-yl)-1-methylindolin-2-one (3h)

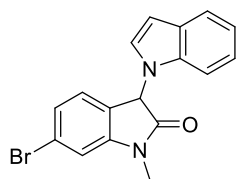

Yellow solid, mp 158 – 159  $^{\circ}\text{C}$ , 40 h, 57.8 mg, 90% yield;  $^1\text{H}$  **NMR** (600 MHz, Chloroform-*d*)  $\delta$  7.65 – 7.63 (m, 1H), 7.20 – 7.12 (m, 4H), 7.05 – 6.98 (m, 3H), 6.58 (d,  $J = 3.0$  Hz, 1H), 5.79 (s, 1H), 3.28 (s, 3H) ppm.  $^{13}\text{C}$  **NMR** (150 MHz, Chloroform-*d*)  $\delta$



172.2, 145.1, 136.0, 129.1, 126.8, 126.2, 126.1, 123.8, 123.4, 122.2, 121.2, 120.2, 112.3, 109.4, 103.3, 58.0, 26.7 ppm. **IR (KBr):** 3066, 1773, 1604, 1559, 1460, 13118, 1253, 1088, 745, 652  $\text{cm}^{-1}$ . **HRMS-ESI:** Exact mass calcd. for  $\text{C}_{17}\text{H}_{13}\text{N}_2\text{OBrNa}^+$  [ $\text{M} + \text{Na}$ ] $^+$ : 363.0103; Found: 363.0109.

### 7-chloro-3-(1H-indol-1-yl)-1-methylindolin-2-one (3i)

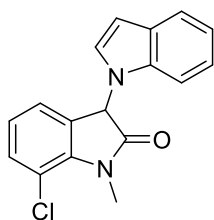

Yellow solid, mp 150 – 151  $^{\circ}\text{C}$ , 45 h, 35.0 mg, 60% yield;  $^1\text{H}$  **NMR** (600 MHz, Acetone- $d_6$ )  $\delta$  7.59 (d,  $J = 8.2$  Hz, 1H), 7.39 (d,  $J = 7.7$  Hz, 1H), 7.28 (s, 1H), 7.10 – 6.99 (m, 5H), 6.54 (d,  $J = 3.6$  Hz, 1H), 6.27 (s, 1H), 3.65 (d,  $J = 1.3$  Hz, 3H) ppm.  $^{13}\text{C}$  **NMR** (150 MHz, Chloroform- $d$ )  $\delta$  172.7, 1139.6, 136.1, 132.4, 129.2, 127.4, 126.8, 124.1, 123.4, 122.3, 121.3, 120.2, 116.2, 109.4, 103.4, 58.1, 30.1 ppm. **IR (KBr):** 1735, 1654, 1608, 1459, 1363, 1340, 1205, 1108, 739, 669  $\text{cm}^{-1}$ . **HRMS-ESI:** Exact mass calcd. for  $\text{C}_{17}\text{H}_{13}\text{N}_2\text{OCINa}^+$  [ $\text{M} + \text{Na}$ ] $^+$ : 319.0614; Found: 319.0608.

### 7-bromo-3-(1H-indol-1-yl)-1-methylindolin-2-one (3j)

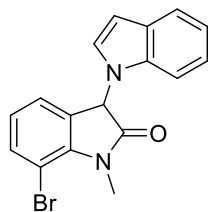

Yellow solid, mp 184 – 185  $^{\circ}\text{C}$ , 45 h, 46.2 mg, 68% yield;  $^1\text{H}$  **NMR** (600 MHz, Chloroform- $d$ )  $\delta$  7.66 (d,  $J = 7.8$  Hz, 1H), 7.53 (d,  $J = 8.2$  Hz, 1H), 7.21 – 7.14 (m, 2H), 7.08 (dt,  $J = 8.4, 1.2$  Hz, 1H), 7.01 (d,  $J = 2.4$  Hz, 1H), 6.90 (dd,  $J = 8.4, 7.2$  Hz, 1H), 6.61 (dd,  $J = 3.0, 0.6$  Hz, 1H), 5.87 (s, 1H), 3.73 (s, 3H) ppm.  $^{13}\text{C}$  **NMR** (150 MHz, Chloroform- $d$ )  $\delta$  172.9, 141.1, 136.1, 135.7, 129.1, 127.7, 126.8, 124.4, 124.0, 122.3, 121.3, 120.2, 109.4, 103.4, 103.0, 58.0, 30.3 ppm. **IR (KBr):** 1719, 1607, 1559, 1459, 1334, 1220, 1101, 735, 652  $\text{cm}^{-1}$ . **HRMS-ESI:** Exact mass calcd. for  $\text{C}_{17}\text{H}_{13}\text{N}_2\text{OBrNa}^+$  [ $\text{M} + \text{Na}$ ] $^+$ : 363.0103; Found: 363.0109.

### 3-(1H-indol-1-yl)-1,5,7-trimethylindolin-2-one (3k)

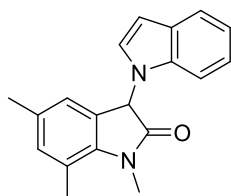

White solid, mp 124 – 125  $^{\circ}\text{C}$ , 40 h, 45.1 mg, 78% yield;  $^1\text{H}$  **NMR** (600 MHz, Chloroform- $d$ )  $\delta$  7.64 (d,  $J = 7.6$  Hz, 1H), 7.19 – 7.07 (m, 3H), 7.01 (d,  $J = 3.2$  Hz, 1H), 6.93 (s, 1H), 6.80

(s, 1H), 6.57 (d,  $J = 3.2$  Hz, 1H), 5.79 (s, 1H), 3.57 (s, 3H), 2.61 (s, 3H), 2.19 (s, 3H) ppm.  $^{13}\text{C}$  NMR (150 MHz, Chloroform- $d$ )  $\delta$  173.2, 139.0, 136.2, 134.2, 132.8, 129.1, 127.0, 125.4, 123.4, 122.0, 121.1, 120.1, 120.0, 109.6, 102.8, 58.2, 30.0, 20.6, 18.8 ppm. **IR (KBr):** 2919, 1735, 1608, 1559, 1469, 1345, 1331, 1080, 756, 699  $\text{cm}^{-1}$ . **HRMS-ESI:** Exact mass calcd. for  $\text{C}_{19}\text{H}_{18}\text{N}_2\text{ONa}^+$   $[\text{M} + \text{Na}]^+$ : 313.1311; Found: 313.1316.

### 3-(5-fluoro-1H-indol-1-yl)-1-methylindolin-2-one (3l)

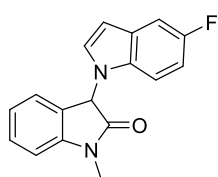

Yellow solid, m.p. 119.6-120.4  $^{\circ}\text{C}$ , 38 h, 13.9 mg, 25% yield.  $^1\text{H}$  NMR (600 MHz, Chloroform- $d$ )  $\delta$  7.42 (t,  $J = 7.8$  Hz, 1H), 7.27 – 7.25 (m, 1H), 7.18 – 7.17 (m, 1H), 7.07 (t,  $J = 7.4$  Hz, 1H), 7.05 (d,  $J = 3.2$  Hz, 1H), 6.98 – 6.91 (m, 2H), 6.89 – 6.86 (m, 1H), 6.52 (d,  $J = 3.4$  Hz, 1H), 5.82 (s, 1H), 3.31 (s, 3H) ppm.  $^{13}\text{C}$  NMR (150 MHz, Chloroform- $d$ )  $\delta$  172.3, 158.1 (d,  $^1J_{\text{C-F}} = 234.8$  Hz), 143.9, 132.7, 130.3, 129.5 (d,  $^3J_{\text{C-F}} = 10.0$  Hz), 128.6, 125.0, 124.2, 123.4, 110.5 (d,  $^2J_{\text{C-F}} = 26.6$  Hz), 110.3 (d,  $^3J_{\text{C-F}} = 9.8$  Hz), 108.8, 106.0 (d,  $^2J_{\text{C-F}} = 23.4$  Hz), 103.0 (d,  $^4J_{\text{C-F}} = 4.6$  Hz), 58.6, 26.6 ppm.  $^{19}\text{F}$  NMR (565 MHz, Chloroform- $d$ )  $\delta$  -124.6. IR (neat)  $\nu$ : 2922, 1700, 11614, 1147, 1199, 754, 722  $\text{cm}^{-1}$ . **HRMS (ESI)  $m/z$ :**  $[\text{M} + \text{Na}]^+$  Calcd for  $\text{C}_{17}\text{H}_{13}\text{ON}_2\text{FNa}$  303.0904; Found 303.0892.

### 3-(6-chloro-1H-indol-1-yl)-1-methylindolin-2-one (3m)

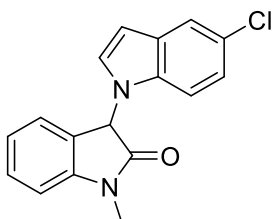

The **3l** was performed with the use of TFE as solvent instead of EtOH in 0.1 mmol scale. Yellow solid, mp 160 – 161  $^{\circ}\text{C}$ , 70 h, 13.0 mg, 44% yield;  $^1\text{H}$  NMR (600 MHz, Chloroform- $d$ )  $\delta$  7.61 (d,  $J = 1.8$  Hz, 1H), 7.45 (t,  $J = 7.8$  Hz, 1H), 7.19 (d,  $J = 7.2$  Hz, 1H), 7.13 – 7.04 (m, 3H), 7.00 (d,  $J = 7.8$  Hz, 2H), 6.53 (d,  $J = 3.6$  Hz, 1H), 5.85 (s, 1H), 3.33 (s, 3H) ppm.  $^{13}\text{C}$  NMR (150 MHz, Chloroform- $d$ )  $\delta$  172.2, 143.8, 134.6, 130.4, 130.2, 128.3, 125.8, 125.0, 124.1, 123.4, 122.4, 120.6, 120.7, 108.9, 102.6, 58.5, 26.6 ppm. **IR (KBr):** 3069, 1727, 1621, 1477, 1458, 1320, 1199, 732  $\text{cm}^{-1}$ . **HRMS-ESI:** Exact mass calcd. for  $\text{C}_{17}\text{H}_{13}\text{N}_2\text{OCINa}^+$   $[\text{M} + \text{Na}]^+$ : 319.0614; Found: 319.0619.

### 1-methyl-3-(5-methyl-1H-indol-1-yl)indolin-2-one (3n)

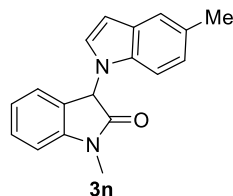

Grey solid, m.p. 119.0-121.1 °C 24 h, 12.8 mg, 23% yield.  $^1\text{H}$  NMR (600 MHz, Chloroform-*d*)  $\delta$  7.41 – 7.38 (m, 2H), 7.16 (d,  $J = 7.2$  Hz, 1H), 7.04 (t,  $J = 7.2$  Hz, 1H), 6.97 – 6.91 (m, 4H), 6.48 (d,  $J = 3.2$  Hz, 1H), 5.83 (s, 1H), 3.31 (s, 3H), 2.41 (s, 3H) ppm.  $^{13}\text{C}$  NMR (150 MHz, Chloroform-*d*)  $\delta$  172.5, 143.8, 134.6, 130.1, 129.4, 129.3, 127.0, 125.0, 124.7, 123.7, 123.3, 120.9, 109.2, 108.7, 102.5, 58.5, 26.6, 21.3 ppm. IR (neat)  $\nu$  : 2921, 1703, 1612, 1470, 1199, 1125, 750, 714  $\text{cm}^{-1}$ . HRMS (ESI)  $m/z$ :  $[\text{M} + \text{Na}]^+$  Calcd for  $\text{C}_{18}\text{H}_{16}\text{ON}_2\text{Na}$  299.1155; Found 299.1145.

### 1-benzyl-3-(1H-indol-1-yl) indolin-2-one (3o)

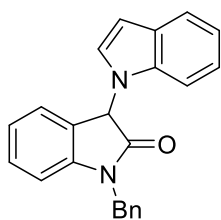

Yellow solid, 68 h, 51.4 mg, 76% yield;  $^1\text{H}$  NMR (600 MHz, Chloroform-*d*)  $\delta$  7.66 – 7.65 (m, 1H), 7.40 – 7.35 (m, 4H), 7.33 – 7.29 (m, 2H), 7.18 (d,  $J = 7.4$  Hz, 1H), 7.14 – 7.10 (m, 2H), 7.06 – 7.00 (m, 3H), 6.90 (d,  $J = 7.8$  Hz, 1H), 6.60 (d,  $J = 3.0$  Hz, 1H), 5.96 (s, 1H), 5.06 (d,  $J = 15.6$  Hz, 1H), 4.93 (d,  $J = 15.6$  Hz, 1H) ppm. All analytical data are consistent with literature <sup>[1]</sup>.

### 3-(1H-indol-1-yl) indolin-2-one (3p)

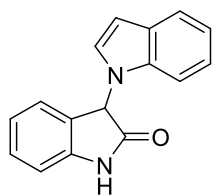

Yellow solid, 48 h, 36.7 mg, 74% yield;  $^1\text{H}$  NMR (600 MHz, DMSO-*d*<sub>6</sub>)  $\delta$  10.89 (s, 1H), 7.59 – 7.57 (m, 1H), 7.36 – 7.29 (m, 2H), 7.04 – 6.94 (m, 6H), 6.53 (d,  $J = 3.2$  Hz, 1H), 6.36 (s, 1H). ppm.  $^{13}\text{C}$  NMR (150 MHz, DMSO-*d*<sub>6</sub>)  $\delta$  174.2, 142.2, 135.6, 129.7, 128.7, 125.9, 124.4, 122.2, 121.5, 120.8, 119.6, 110.3, 109.9, 101.8, 58.8 ppm. All analytical data are consistent with literature <sup>[1]</sup>.

### 3-(1H-indol-1-yl)-5-methylindolin-2-one (3q)

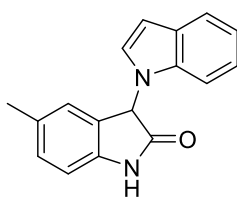

Yellow solid, 28 h, 35.6 mg, 68% yield;  $^1\text{H NMR}$  (600 MHz, Chloroform-*d*)  $\delta$  9.03 (s, 1H), 7.70 – 7.66 (m, 1H), 7.20 – 7.15 (m, 3H), 7.12 – 7.08 (m, 2H), 6.96 (s, 1H), 6.80 (d,  $J = 7.8$  Hz, 1H), 6.63 (d,  $J = 3.0$  Hz, 1H), 5.88 (s, 1H), 2.25 (s, 3H) ppm.

All analytical data are consistent with literature <sup>[1]</sup>.

### 3-(1H-indol-1-yl)-5-methoxyindolin-2-one (3r)

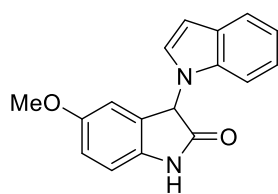

yellow solid, 48 h, 50.6 mg, 91% yield;  $^1\text{H NMR}$  (600 MHz, Chloroform-*d*)  $\delta$  9.42 (s, 1H), 7.68 (d,  $J = 6.6$  Hz, 1H), 7.20 – 7.15 (m, 3H), 7.09 (s, 1H), 6.78 (dd,  $J = 8.4, 2.4$  Hz, 1H), 6.73 (d,  $J = 2.4$  Hz, 1H), 6.69 (d,  $J = 8.4$  Hz, 1H), 6.63 (d,  $J = 3.0$

Hz, 1H), 5.86 (s, 1H), 3.69 (s, 3H) ppm. All analytical data are consistent with literature <sup>[1]</sup>.

### 5-fluoro-3-(1H-indol-1-yl) indolin-2-one (3s)

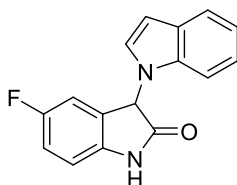

Brown solid, 48 h, 43.1 mg, 81% yields;  $^1\text{H NMR}$  (600 MHz, Chloroform-*d*)  $\delta$  9.31 (s, 1H), 7.68 – 7.63 (m, 1H), 7.33 (d,  $J = 6.5$  Hz, 1H), 7.24 – 6.96 (m, 5H), 6.62 – 6.55 (m, 2H), 5.84 (s, 1H) ppm.  $^{19}\text{F NMR}$  (564 MHz, Chloroform-*d*)  $\delta$  -118.8 ppm,

All analytical data are consistent with literature <sup>[1]</sup>.

### 5-chloro-3-(1H-indol-1-yl) indolin-2-one (3t)

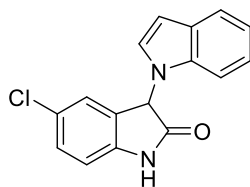

Pale yellow solid, 48 h, 49.9 mg, 88% yields;  $^1\text{H NMR}$  (600 MHz, Chloroform-*d*)  $\delta$  9.39 (s, 1H), 7.70 – 7.66 (m, 1H), 7.20 – 7.17 (m, 3H), 7.10 – 7.04 (m, 3H), 7.10 – 7.04 (m, 2H), 5.85 (s, 1H) ppm. All analytical data are consistent with literature <sup>[1]</sup>.

### 5-bromo-3-(1H-indol-1-yl) indolin-2-one (3u)

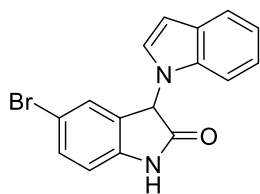

Brown solid, 42 h, 34.6 mg, 53% yields; **<sup>1</sup>H NMR** (600 MHz, acetone-*d*<sub>6</sub>): δ 9.92 (s, br, 1H), 7.61-7.58 (m, 1H), 7.54-7.50 (m, 1H), 7.31 (d, *J* = 3.3 Hz, 1H), 7.25 (s, br, 1H), 7.10-7.04 (m, 4H), 6.55 (d, *J* = 3.3 Hz, 1H), 6.28 (s, 1H); All analytical data are consistent with literature <sup>[1]</sup>.

### 3-(1H-indol-1-yl)-5-iodoindolin-2-one (3v)

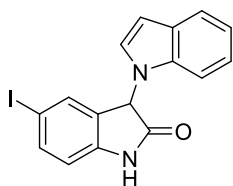

Yellow solid, mp 184 – 185 °C, 46 h, 60.6 mg, 81% yield; **<sup>1</sup>H NMR** (600 MHz, DMSO-*d*<sub>6</sub>) δ 11.01 (s, 1H), 7.66 (d, *J* = 8.4 Hz, 1H), 7.56 (d, *J* = 8.4 Hz, 1H), 7.35 (s, 1H), 7.26 (s, 1H), 7.07 – 6.96 (m, 3H), 6.86 (d, *J* = 8.4 Hz, 1H), 6.53 (d, *J* = 3.6 Hz, 1H), 6.39 (s, 1H) ppm. **<sup>13</sup>C NMR** (150 MHz, DMSO-*d*<sub>6</sub>) δ 173.5, 141.9, 138.2, 132.4, 128.7, 128.6, 121.7, 120.8, 119.7, 112.8, 109.7, 102.0, 84.5, 58.4 ppm. **IR (KBr)**: 1710, 1664, 1624, 1559, 1515, 1469, 1314, 1216, 853, 792, 669 cm<sup>-1</sup>. **HRMS-ESI**: Exact mass calcd. for C<sub>16</sub>H<sub>11</sub>N<sub>2</sub>OINa<sup>+</sup> [M + Na]<sup>+</sup>: 396.9811; Found: 396.9808.

### 3-(1H-indol-1-yl)-6-methoxyindolin-2-one (3w)

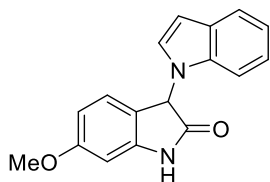

Yellow solid, mp 144 – 145 °C, 48 h, 39.5 mg, 71% yield; **<sup>1</sup>H NMR** (600 MHz, Chloroform-*d*) δ 9.03 (s, 1H), 7.67 (d, *J* = 7.2 Hz, 1H), 7.19 – 7.13 (m, 3H), 7.08 – 7.05 (m, 2H), 6.61 (d, *J* = 3.0 Hz, 1H), 6.56 – 6.53 (m, 2H), 5.87 (s, 1H), 3.80 (s, 3H) ppm. **<sup>13</sup>C NMR** (150 MHz, Chloroform-*d*) δ 175.8, 161.5, 142.3, 136.1, 129.2, 127.0, 126.1, 122.2, 121.2, 120.1, 116.6, 109.7, 108.3, 103.0, 97.8, 58.6, 55.6 ppm. **IR (KBr)**: 1773, 1719, 1630, 1508, 1457, 1344, 1304, 1157, 738, 652 cm<sup>-1</sup>. **HRMS-ESI**: Exact mass calcd. for C<sub>17</sub>H<sub>14</sub>N<sub>2</sub>O<sub>2</sub>Na<sup>+</sup> [M + Na]<sup>+</sup>: 301.0948; Found: 301.0953.

### 6-chloro-3-(1H-indol-1-yl) indolin-2-one (3x)

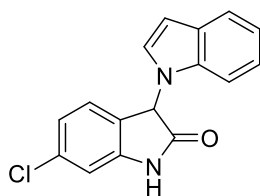

Yellow solid, mp 174 – 175 °C, 48 h, 47.3 mg, 84% yield;  $^1\text{H}$  NMR (600 MHz, Chloroform-*d*)  $\delta$  8.64 (s, 1H), 7.67 (d,  $J = 7.2$  Hz, 1H), 7.20 – 7.14 (m, 2H), 7.11 – 7.02 (m, 4H), 6.97 (d,  $J = 1.8$  Hz, 1H), 6.62 (d,  $J = 3.0$  Hz, 1H), 5.88 (s, 1H) ppm.  $^{13}\text{C}$  NMR (150 MHz, Chloroform-*d*)  $\delta$  174.5, 141.9, 135.9, 129.2, 126.3, 123.5, 123.4, 122.4, 121.4, 120.3, 111.3, 109.5, 103.5, 29.7 ppm. IR (KBr): 2963, 1697, 1608, 1509, 1469, 1261, 1019, 756, 652  $\text{cm}^{-1}$ . HRMS-ESI: Exact mass calcd. for  $\text{C}_{16}\text{H}_{11}\text{N}_2\text{OCINa}^+$  [ $\text{M} + \text{Na}$ ] $^+$ : 305.0452; Found: 305.0453.

### 6-bromo-3-(1H-indol-1-yl) indolin-2-one (3y)

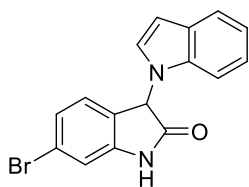

Yellow solid, mp 183 – 185 °C, 72 h, 57.6 mg, 88% yield;  $^1\text{H}$  NMR (600 MHz, DMSO-*d*<sub>6</sub>)  $\delta$  11.02 (s, 1H), 7.61 – 7.57 (m, 1H), 7.52 – 7.50 (m, 1H), 7.35 (br, 1H), 7.14 (s, 1H), 7.07 – 7.02 (m, 2H), 6.97 (d,  $J = 8.4$  Hz, 2H), 6.54 (dd,  $J = 3.6, 0.6$  Hz, 1H), 6.42 (s, 1H).  $^{13}\text{C}$  NMR (150 MHz, DMSO-*d*<sub>6</sub>) 173.7, 141.5, 132.4, 128.7, 128.3, 127.0, 121.7, 120.8, 119.7, 113.8, 112.3, 109.7, 102.1, 58.6 ppm. IR (KBr): 3040, 1717, 1620, 1470, 1327, 1196, 897, 866, 748  $\text{cm}^{-1}$ . HRMS-ESI: Exact mass calcd. for  $\text{C}_{16}\text{H}_{11}\text{N}_2\text{OBrNa}^+$  [ $\text{M} + \text{Na}$ ] $^+$ : 348.9947; Found: 348.9952.

### 7-chloro-3-(1H-indol-1-yl) indolin-2-one (3z)

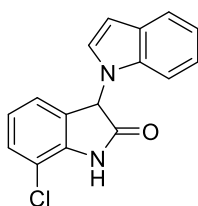

Yellow solid, 72 h, 51.3 mg, 91% yield;  $^1\text{H}$  NMR (600 MHz, Chloroform-*d*)  $\delta$  7.96 (s, 1H), 7.67 (d,  $J = 7.8$  Hz, 1H), 7.37 (d,  $J = 8.0$  Hz, 1H), 7.21 – 7.14 (m, 3H), 7.08 – 7.05 (m, 2H), 7.03 – 7.00 (m, 1H), 6.62 (d,  $J = 3.0$  Hz, 1H), 5.99 (s, 1H) ppm. All analytical data are consistent with literature <sup>[1]</sup>.

### 7-bromo-3-(1H-indol-1-yl) indolin-2-one (3aa)

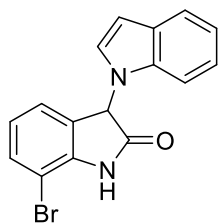

White solid, 28 h, 44.3 mg, 68% yield;  $^1\text{H NMR}$  (600 MHz, Acetone- $d_6$ )  $\delta$  9.98 (s, 1H), 7.61 (d,  $J = 7.2$  Hz, 1H), 7.55 (d,  $J = 7.2$  Hz, 1H), 7.32 (d,  $J = 3.0$  Hz, 1H), 7.14 – 7.05 (m, 4H), 6.98 (t,  $J = 7.2$  Hz, 1H), 6.57 (d,  $J = 3.6$  Hz, 1H), 6.36 (s, 1H) ppm. All analytical data are consistent with literature <sup>[1]</sup>.

### 3-(1H-indol-1-yl)-5,7-dimethylindolin-2-one (3ab)

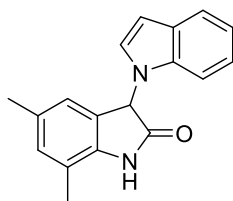

Yellow solid, mp 114 – 115 °C, 48 h, 46.4 mg, 84% yield;  $^1\text{H NMR}$  (600 MHz, Chloroform- $d$ )  $\delta$  8.83 (s, 1H), 7.65 (d,  $J = 7.2$  Hz, 1H), 7.15 – 7.09 (m, 3H), 7.06 (d,  $J = 3.0$  Hz, 1H), 6.93 (s, 1H), 6.80 (s, 1H), 6.59 (d,  $J = 3.6$  Hz, 1H), 5.87 (s, 1H), 2.20 (s, 6H) ppm.  $^{13}\text{C NMR}$  (150 MHz, Chloroform- $d$ )  $\delta$  175.1, 137.0, 136.2, 132.9, 131.9, 129.1, 127.2, 124.9, 123.1, 122.1, 121.2, 120.0, 119.8, 109.7, 102.9, 59.3, 20.9, 16 ppm; **IR (KBr)**: 2974, 2925, 1716, 1648, 1492, 1325, 1126, 834, 761, 690  $\text{cm}^{-1}$ . **HRMS-ESI**: Exact mass calcd. for  $\text{C}_{18}\text{H}_{16}\text{N}_2\text{ONa}^+$   $[\text{M} + \text{Na}]^+$ : 299.1155; Found: 299.1160.

### 3-(1H-indol-1-yl)-7-nitroindolin-2-one (3ac)

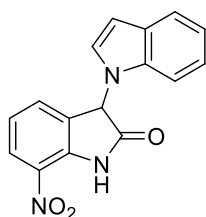

Yellow solid, mp 134 – 135 °C, 72 h, 37.0 mg, 63% yield;  $^1\text{H NMR}$  (600 MHz, DMSO- $d_6$ )  $\delta$  11.59 (s, 1H), 8.12 (d,  $J = 9.0$  Hz, 1H), 7.62 – 7.57 (m, 1H), 7.40 (d,  $J = 7.2$  Hz, 2H), 7.16 (dd,  $J = 9.0, 7.2$  Hz, 1H), 7.06 – 7.05 (m, 3H), 6.58 – 6.56 (m, 2H) ppm.  $^{13}\text{C NMR}$  (150 MHz, DMSO- $d_6$ )  $\delta$  174.7, 138.7, 131.6, 130.5, 129.3, 128.7, 124.5, 122.4, 121.8, 120.9, 119.8, 109.8, 102.4, 79.2, 57.6 ppm. **IR (KBr)**: 1773, 1725, 1671, 1654, 1459, 1196, 739, 646  $\text{cm}^{-1}$ . **HRMS-ESI**: Exact mass calcd. for  $\text{C}_{16}\text{H}_{11}\text{N}_3\text{O}_3\text{Na}^+$   $[\text{M} + \text{Na}]^+$ : 316.0698; Found: 316.0688.

## 5. Scale-up experiments

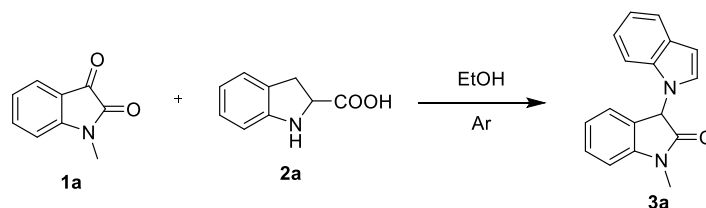

**Procedure:** A mixture of **1a** (1.13 g, 7.0 mmol) and **2a** (1.14 g, 7.0 mmol) were added in a dried Schlenk tube, then EtOH (70 mL) was added under Ar atmosphere, and the reaction system was stirred at 50 °C. The reaction was monitored by TLC until 1-methylindoline-2,3-dione was fully consumed. The reaction was extracted with DCM. The combined organic portions were washed with water and brine, dried (Na<sub>2</sub>SO<sub>4</sub>), filtered, and purified by flash column chromatography (Petroleum ether/Ethyl acetate = 10/1) to afford 2-oxindole **3a** (1.65 g, 90% yield).

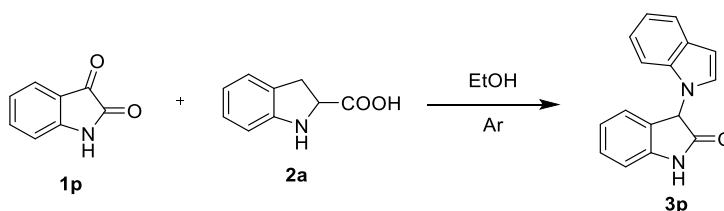

**Procedure:** A mixture of **1p** (1.03 g, 7.0 mmol) and **2a** (1.14 g, 7.0 mmol) were added in a dried Schlenk tube, then EtOH (70 mL) was added under Ar atmosphere, and the reaction system was stirred at 50 °C. The reaction was monitored by TLC until compound **1** was fully consumed. The reaction was extracted with DCM. The combined organic portions were washed with water and brine, dried (Na<sub>2</sub>SO<sub>4</sub>), filtered, and purified by flash column chromatography (Petroleum ether/Ethyl acetate = 10/1) to afford 2-oxindole **3p** (1.36 g, 78% yield).



## 6. Transformations and applications

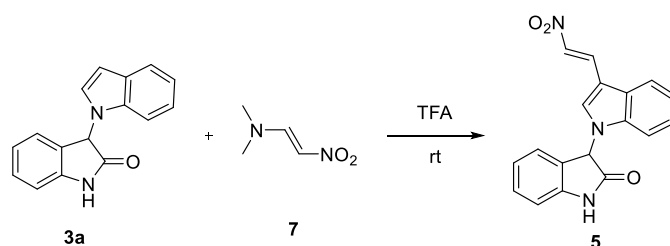

To a solution of 1,1-dimethylamino-2-nitroethylene (0.2 mmol) in trifluoroacetic acid (1 mL) was added **3a** (0.2 mmol) at 0 °C. The mixture was allowed to warm to room temperature and stirred for 0.5 hours. The reaction mixture was treated to pH 9~10 using saturated NaHCO<sub>3</sub> and extracted with DCM. The combined organic layers were washed with saturated brine, dried over Na<sub>2</sub>SO<sub>4</sub>, the filtrate was concentrated under reduced pressure, purified by flash chromatography (Petroleum ether/ethyl acetate = 2/1) to give product **5** (45.5 mg, 71% yield).

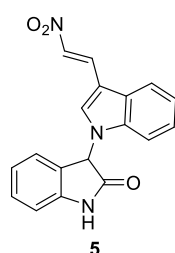

Yellow solid, 45.5 mg, 71% yield. <sup>1</sup>H NMR (600 MHz, DMSO-*d*<sub>6</sub>) δ 11.02 (s, 1H), 8.41 (d, *J* = 13.6 Hz, 1H), 8.27 (s, 1H), 8.07 (d, *J* = 13.6 Hz, 1H), 8.04 (d, *J* = 7.8 Hz, 1H), 7.38 – 7.24 (m, 4H), 7.12 (d, *J* = 7.4 Hz, 1H), 7.04 (d, *J* = 7.8 Hz, 1H), 7.00 (t, *J* = 7.4 Hz, 1H), 6.53 (s, 1H) ppm. <sup>13</sup>C NMR (150 MHz, DMSO-*d*<sub>6</sub>) δ 173.3, 142.3, 133.6, 132.5, 130.2, 125.6, 124.8, 124.7, 123.9, 122.5, 122.5, 121.1, 111.2, 110.6, 108.6, 79.2 ppm. HRMS (ESI) *m/z*: [M + H]<sup>+</sup> Calcd for C<sub>18</sub>H<sub>13</sub>O<sub>3</sub>N<sub>3</sub>Na 342.0849; Found 342.0839.

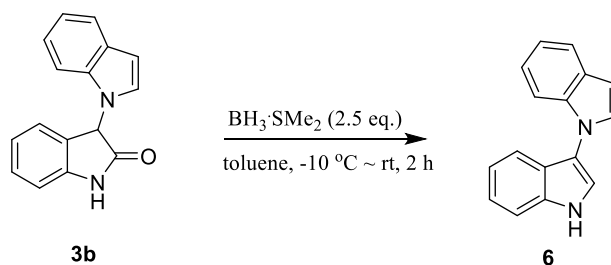

To a solution of compound **3b** (124 mg, 0.5 mmol) in toluene (5.0 mL) at -10 °C was added BH<sub>3</sub>.SMe<sub>2</sub> (2 M THF solution, 625 μL, 1.25 mmol) under Ar. The resulting mixture was then allowed to warm to room temperature and continued to stir for about

4 h before a saturated aqueous solution of  $\text{NH}_4\text{Cl}$  was added to quench the reaction. The aqueous layer was separated and extracted with DCM. The combined organic layers were dried over  $\text{Na}_2\text{SO}_4$  and concentrated. Silica gel column chromatography (petroleum ether/ethyl acetate = 20/1) afforded bi-indole **6** in 61% yield as colorless oil;  $^1\text{H NMR}$  (600 MHz, Chloroform-*d*)  $\delta$  8.09 (s, 1H), 7.84 – 7.78 (m, 1H), 7.53 (d,  $J$  = 8.0 Hz, 1H), 7.47 (d,  $J$  = 8.3 Hz, 1H), 7.42 (dd,  $J$  = 9.6, 4.5 Hz, 2H), 7.38 – 7.33 (m, 2H), 7.30 – 7.24 (m, 2H), 6.79 (d,  $J$  = 3.1 Hz, 1H) ppm.  $^{13}\text{C NMR}$  (150 MHz, Chloroform-*d*)  $\delta$  137.4, 134.7, 129.6, 128.5, 12.7, 123.1, 122.0, 120.8, 120.4, 120.0, 119.2, 118.5, 117.5, 111.6, 110.8, 102.4 ppm. Analytical data were consistent with previously reported data.<sup>[1]</sup>

## 7. References

- [1] Y. H. Wang, J. S. Tian, W. P. Tan, Q. Cao, X. X. Zhang, Z. Y. Cao, F. Zhou, X. Wang and J. Zhou, *Angew. Chem., Int. Ed.* 2020, **50**, 1634-1643.
- [2] M. B. Chaudhari, Y. Sutar, S. Malpathak, A. Hazra and B. Gnanaprakasam, *Org. Lett.* 2017, **19**, 3628–3631
- [3] X. Y. Zhou and X. Chen, *Org. Biomol. Chem.*, 2021,**19**, 548-551.

## 8. <sup>1</sup>H NMR and <sup>13</sup>C NMR spectra of compounds

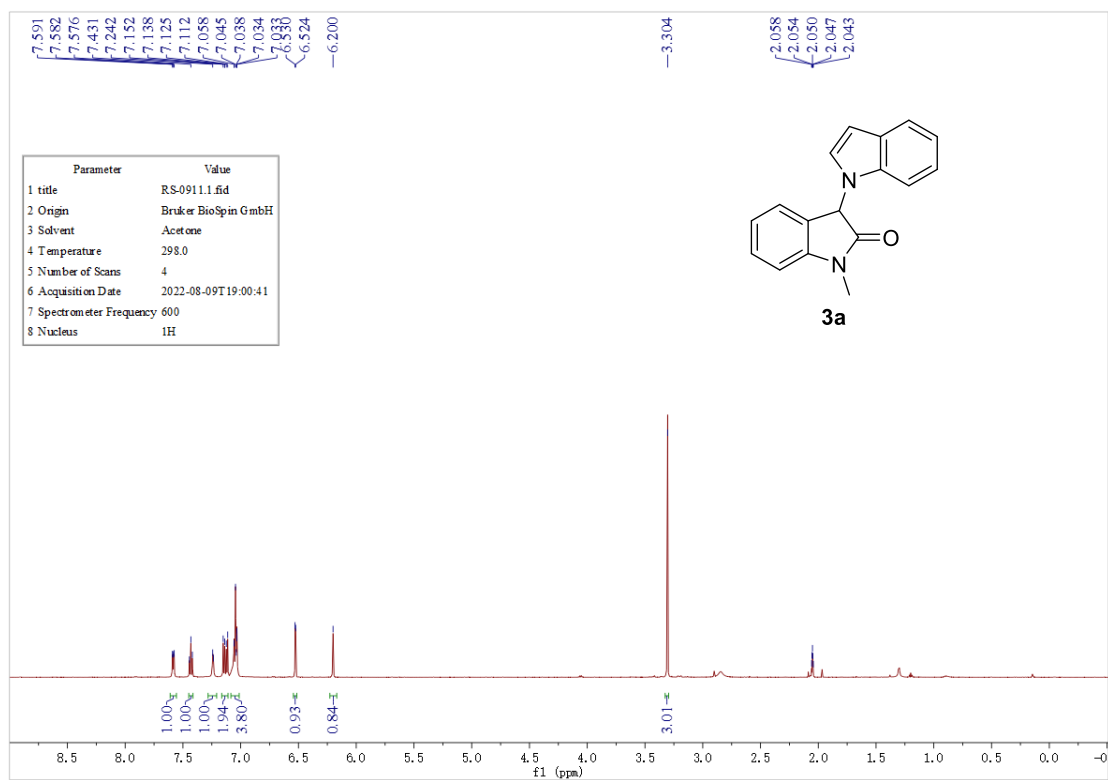

7.643  
7.631  
7.161  
7.149  
7.137  
7.132  
7.130  
7.117  
7.106  
7.019  
7.014  
6.938  
6.934  
6.924  
6.920  
6.882  
6.868  
6.782  
6.779  
6.580  
6.575  
5.843

3.701  
3.291

| Parameter                | Value               |
|--------------------------|---------------------|
| 1 title                  | RS-0932.1.fid       |
| 2 Origin                 | Bruker BioSpin GmbH |
| 3 Solvent                | CDCl3               |
| 4 Temperature            | 298.0               |
| 5 Number of Scans        | 4                   |
| 6 Acquisition Date       | 2022-08-25T02:28:44 |
| 7 Spectrometer Frequency | 600                 |
| 8 Nucleus                | 1H                  |

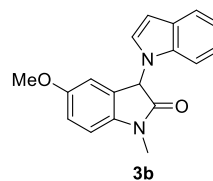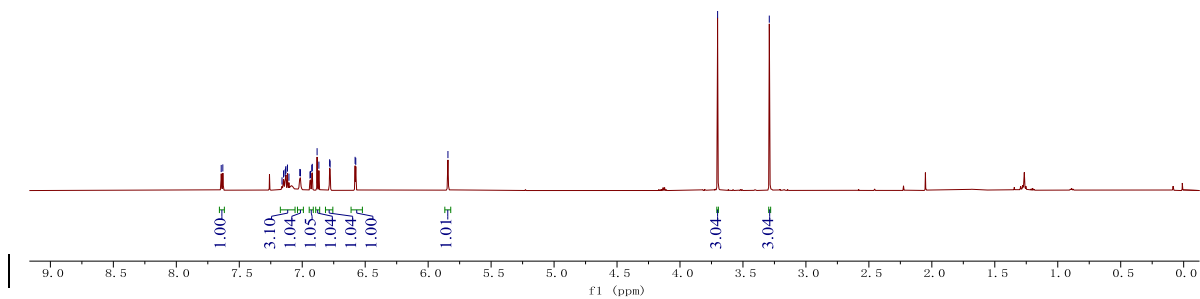

172.170  
156.481  
137.186  
136.210  
129.147  
126.976  
125.825  
122.143  
121.175  
120.062  
114.821  
111.849  
109.598  
109.226  
103.060

77.212  
77.000  
76.789  
58.734  
55.769  
26.649

| Parameter                | Value               |
|--------------------------|---------------------|
| 1 title                  | RS-0932.2.fid       |
| 2 Origin                 | Bruker BioSpin GmbH |
| 3 Solvent                | CDCl3               |
| 4 Temperature            | 298.0               |
| 5 Number of Scans        | 286                 |
| 6 Acquisition Date       | 2022-08-25T20:17:32 |
| 7 Spectrometer Frequency | 151                 |
| 8 Nucleus                | 13C                 |

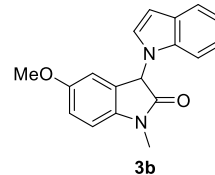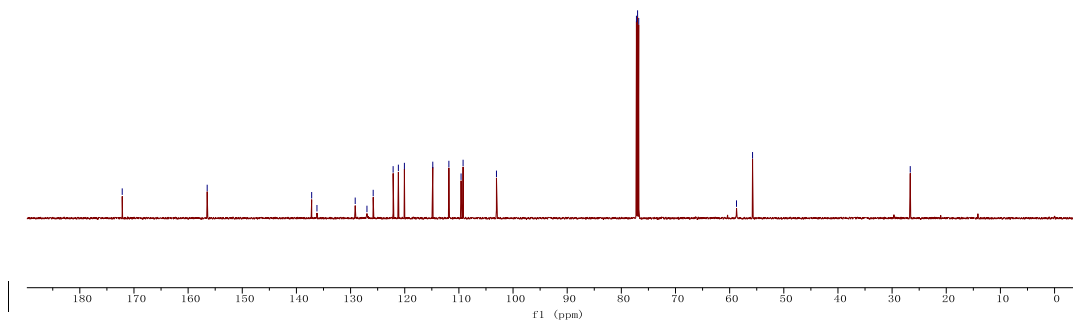

7.578  
7.575  
7.569  
7.566  
7.561  
7.234  
7.232  
7.231  
7.231  
7.230  
7.222  
7.221  
7.219  
7.218  
7.030  
7.025  
7.018  
7.012  
6.928  
6.514  
6.509  
6.139

3.270  
2.840  
2.216

| Parameter                | Value               |
|--------------------------|---------------------|
| 1 title                  | RS-0922.1.1.1r      |
| 2 Origin                 | Bruker BioSpin GmbH |
| 3 Solvent                | Acetone             |
| 4 Temperature            | 298.0               |
| 5 Number of Scans        | 4                   |
| 6 Acquisition Date       | 2022-08-17T09:26:00 |
| 7 Spectrometer Frequency | 600                 |
| 8 Nucleus                | <sup>1</sup> H      |

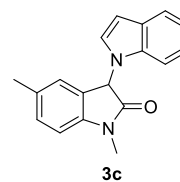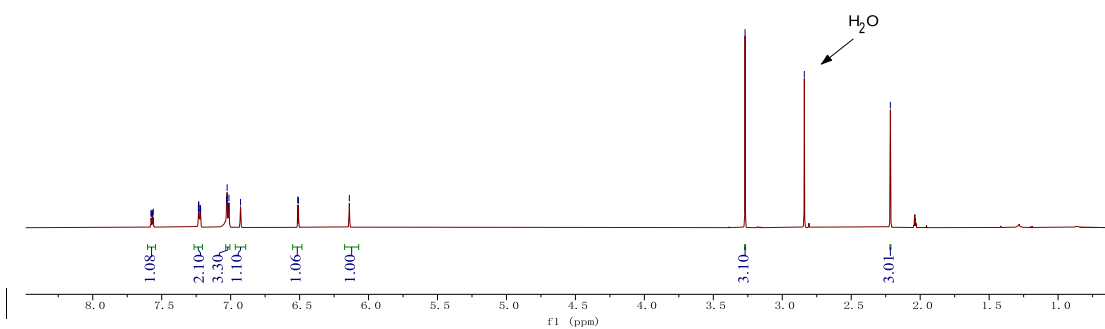

172.419  
141.434  
136.230  
133.049  
130.331  
129.140  
126.979  
125.686  
124.712  
122.103  
121.177  
120.018  
109.624  
108.456  
102.958

77.211  
77.000  
76.788

58.497

26.619  
20.955

| Parameter                | Value               |
|--------------------------|---------------------|
| 1 title                  | RS-0922.2.fid       |
| 2 Origin                 | Bruker BioSpin GmbH |
| 3 Solvent                | CDCl <sub>3</sub>   |
| 4 Temperature            | 298.0               |
| 5 Number of Scans        | 512                 |
| 6 Acquisition Date       | 2022-08-26T06:43:11 |
| 7 Spectrometer Frequency | 151                 |
| 8 Nucleus                | <sup>13</sup> C     |

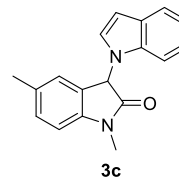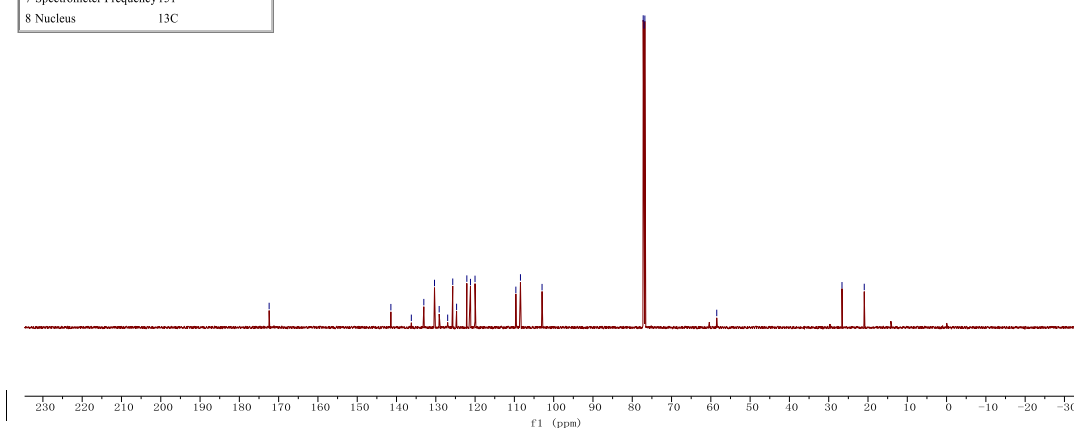

7.649  
7.638  
7.635  
7.169  
7.166  
7.157  
7.154  
7.142  
7.140  
7.130  
7.128  
7.115  
7.111  
7.100  
7.096  
7.044  
7.005  
7.000  
6.934  
6.932  
6.929  
6.927  
6.921  
6.919  
6.917  
6.915  
6.910  
6.903  
6.895  
6.889  
6.592  
6.588  
5.860  
3.314

| Parameter                | Value               |
|--------------------------|---------------------|
| 1 title                  | RS-0925.1.fid       |
| 2 Origin                 | Bruker BioSpin GmbH |
| 3 Solvent                | CDCl3               |
| 4 Temperature            | 298.0               |
| 5 Number of Scans        | 8                   |
| 6 Acquisition Date       | 2022-08-16T09:47:53 |
| 7 Spectrometer Frequency | 600                 |
| 8 Nucleus                | 1H                  |

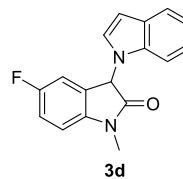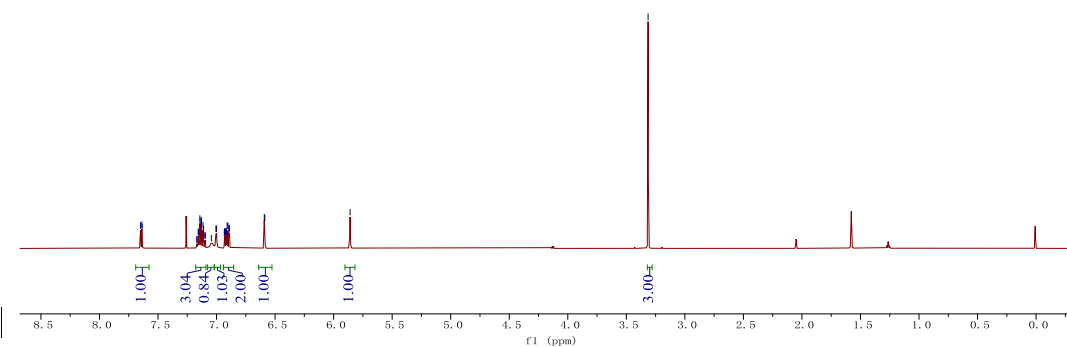

172.144  
160.266  
158.655  
139.754  
139.738  
136.095  
129.201  
126.838  
126.210  
126.157  
122.305  
121.326  
120.239  
116.587  
116.431  
113.241  
113.073  
109.393  
109.328  
103.397  
77.212  
77.000  
76.788  
58.506  
26.754

| Parameter                | Value               |
|--------------------------|---------------------|
| 1 title                  | RS-0925.2.fid       |
| 2 Origin                 | Bruker BioSpin GmbH |
| 3 Solvent                | CDCl3               |
| 4 Temperature            | 298.0               |
| 5 Number of Scans        | 264                 |
| 6 Acquisition Date       | 2022-08-16T10:01:10 |
| 7 Spectrometer Frequency | 151                 |
| 8 Nucleus                | 13C                 |

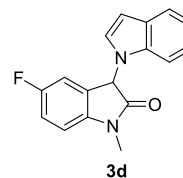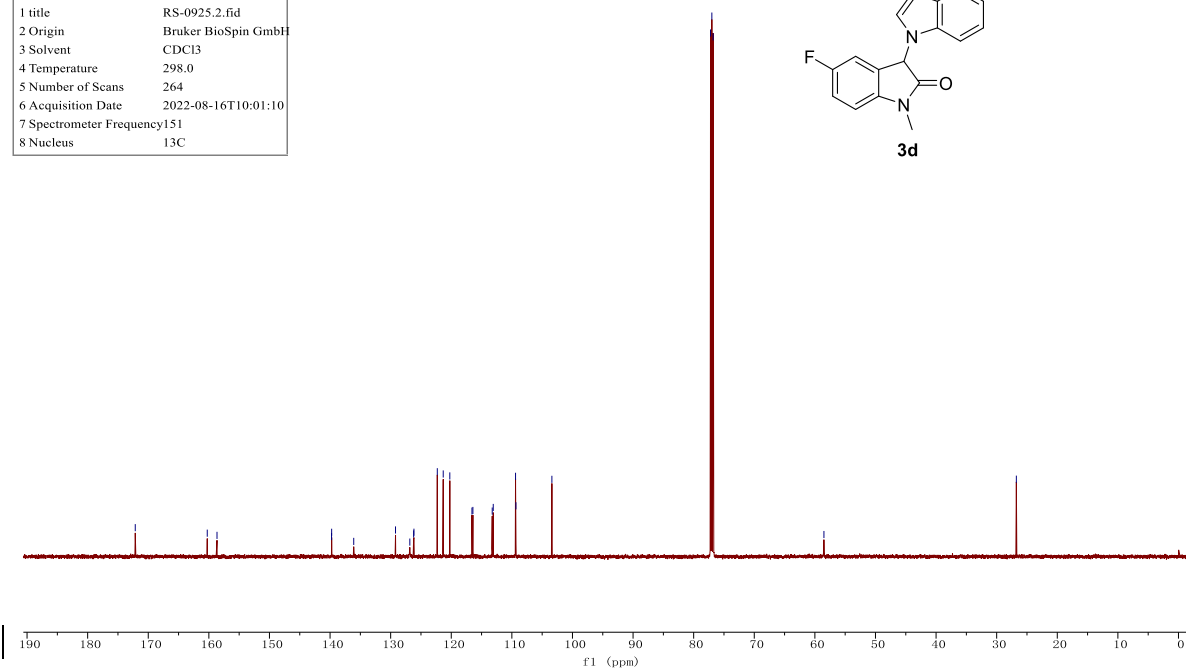

| Parameter                | value               |
|--------------------------|---------------------|
| 1 title                  | LRS-0925.2.fid      |
| 2 Origin                 | Bruker BioSpin GmbH |
| 3 Solvent                | CDCl3               |
| 4 Temperature            | 295.2               |
| 5 Number of Scans        | 16                  |
| 6 Acquisition Date       | 2023-09-20T15:01:57 |
| 7 Spectrometer Frequency | 564.63              |
| 8 Nucleus                | 19F                 |

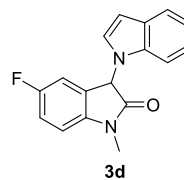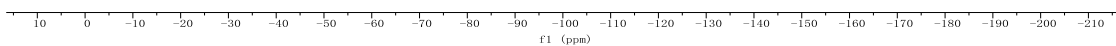



7.683  
7.651  
7.649  
7.640  
7.637  
7.393  
7.391  
7.389  
7.388  
7.379  
7.377  
7.375  
7.374  
7.260  
7.173  
7.161  
7.151  
7.149  
7.146  
7.143  
7.133  
7.131  
7.121  
7.119  
7.043  
6.996  
6.905  
6.891  
6.596  
6.590  
5.861

3.313

| Parameter                | Value               |
|--------------------------|---------------------|
| 1 title                  | RS-0921.1.fid       |
| 2 Origin                 | Bruker BioSpin GmbH |
| 3 Solvent                | CDCl3               |
| 4 Temperature            | 298.0               |
| 5 Number of Scans        | 8                   |
| 6 Acquisition Date       | 2022-08-16T10:04:36 |
| 7 Spectrometer Frequency | 600                 |
| 8 Nucleus                | 1H                  |

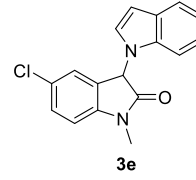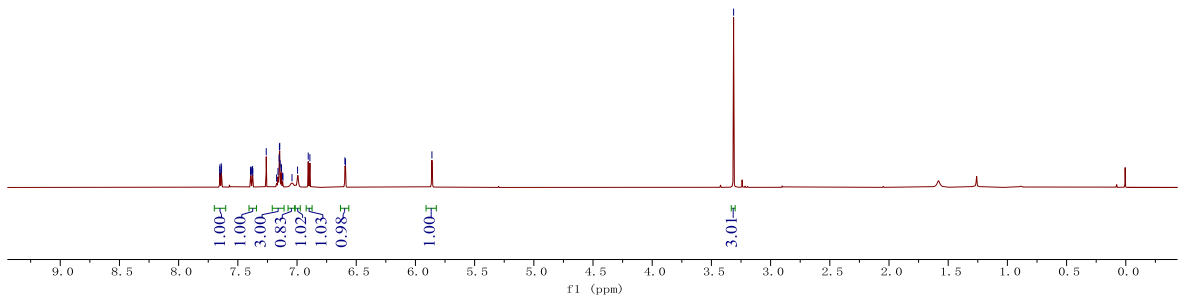

171.986  
142.320  
136.093  
130.129  
129.187  
128.845  
126.823  
126.273  
125.369  
122.352  
121.345  
120.268  
109.700  
109.359  
103.460

77.212  
77.000  
76.788  
58.236  
26.749

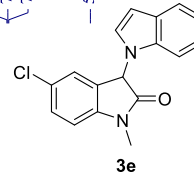

| Parameter                | Value               |
|--------------------------|---------------------|
| 1 title                  | RS-0921.2.fid       |
| 2 Origin                 | Bruker BioSpin GmbH |
| 3 Solvent                | CDCl3               |
| 4 Temperature            | 298.0               |
| 5 Number of Scans        | 512                 |
| 6 Acquisition Date       | 2022-08-16T10:29:48 |
| 7 Spectrometer Frequency | 151                 |
| 8 Nucleus                | 13C                 |

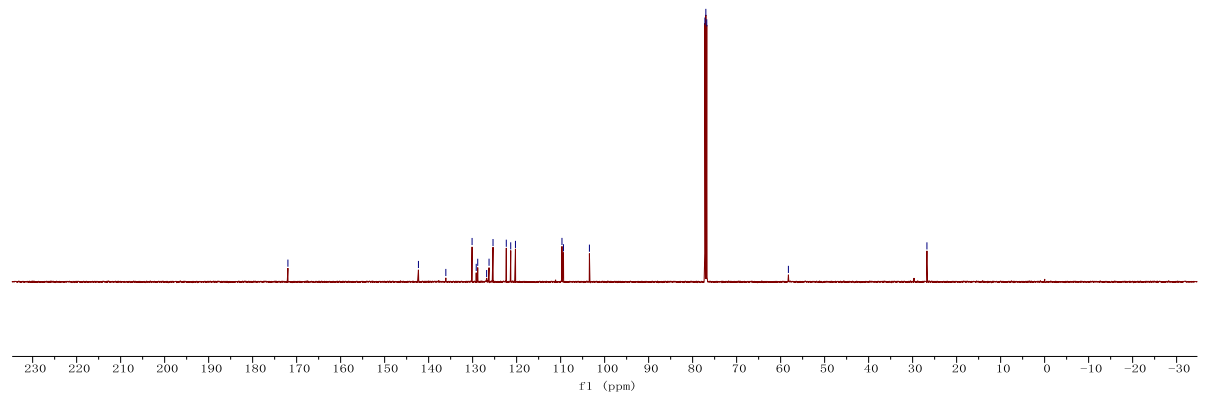

LRS-0820.1.fid  
 7.688  
 7.682  
 7.677  
 7.674  
 7.562  
 7.560  
 7.548  
 7.546  
 7.305  
 7.198  
 7.184  
 7.181  
 7.171  
 7.169  
 7.159  
 7.157  
 7.029  
 7.023  
 6.871  
 6.857  
 6.630  
 6.625  
 3.319

| Parameter                | value               |
|--------------------------|---------------------|
| 1 title                  | LRS-0820.1.fid      |
| 2 origin                 | Bruker BioSpin GmbH |
| 3 solvent                | CDCl3               |
| 4 temperature            | 295.0               |
| 5 number of scans        | 4                   |
| 6 acquisition date       | 2023-09-26T01:41:12 |
| 7 spectrometer frequency | 600.13              |
| 8 nucleus                | 1H                  |

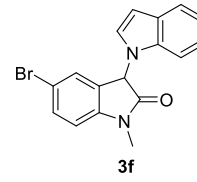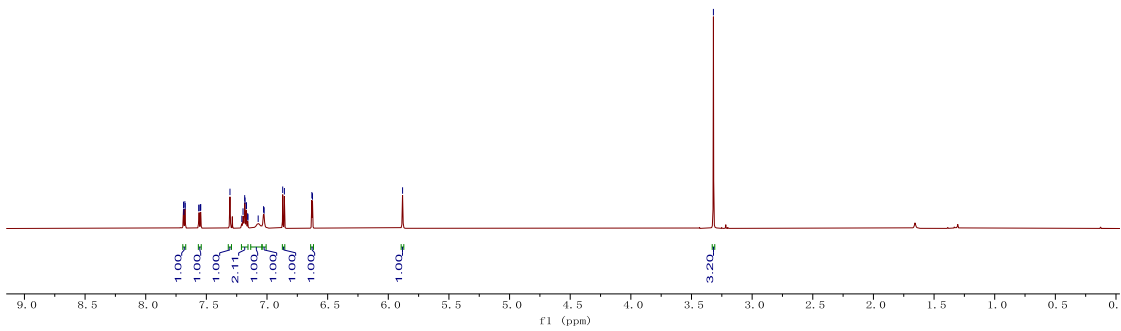

LRS-0820.2.fid  
 171.827  
 142.739  
 136.003  
 132.981  
 129.108  
 127.979  
 126.828  
 126.532  
 122.305  
 121.290  
 120.218  
 115.930  
 110.169  
 109.327  
 103.385  
 77.210  
 76.999  
 76.787  
 58.096  
 26.671

| Parameter                | Value               |
|--------------------------|---------------------|
| 1 title                  | LRS-0820.2.fid      |
| 2 origin                 | Bruker BioSpin GmbH |
| 3 solvent                | CDCl3               |
| 4 temperature            | 295.0               |
| 5 number of scans        | 512                 |
| 6 acquisition date       | 2023-09-26T02:06:35 |
| 7 spectrometer frequency | 150.92              |
| 8 nucleus                | 13C                 |

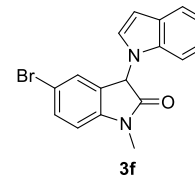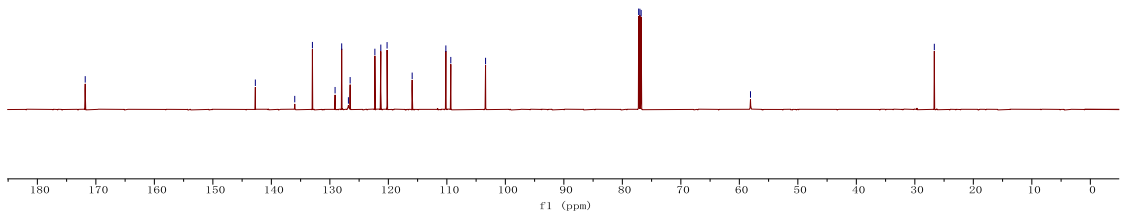

7.641  
7.629  
7.164  
7.153  
7.141  
7.136  
7.134  
7.124  
7.112  
7.089  
7.076  
7.043  
7.040  
7.030  
7.027  
6.983  
6.979  
6.579  
6.574  
5.840

3.301

| Parameter                | Value               |
|--------------------------|---------------------|
| 1 title                  | RS-0928.1.fid       |
| 2 Origin                 | Bruker BioSpin GmbH |
| 3 Solvent                | CDCl3               |
| 4 Temperature            | 298.0               |
| 5 Number of Scans        | 8                   |
| 6 Acquisition Date       | 2022-09-14T09:03:37 |
| 7 Spectrometer Frequency | 600                 |
| 8 Nucleus                | 1H                  |

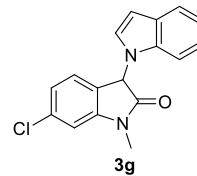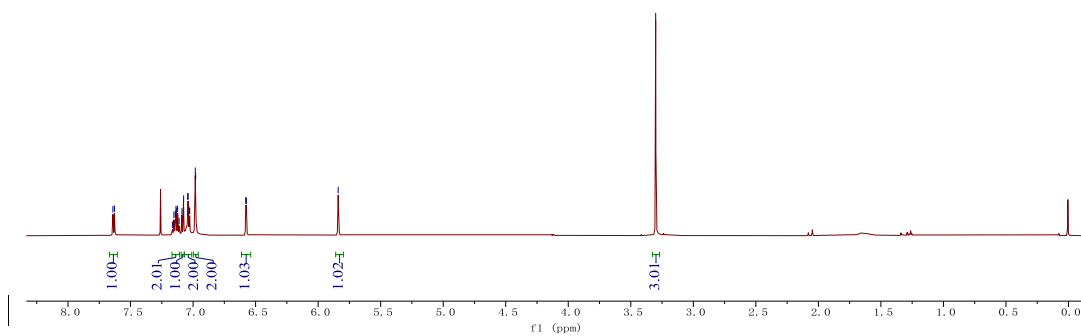

172.418  
145.046  
136.111  
136.065  
129.192  
126.786  
125.934  
123.198  
122.917  
122.286  
121.304  
120.228  
109.565  
109.454  
103.341  
77.211  
77.000  
76.788  
57.978  
26.734

| Parameter                | Value               |
|--------------------------|---------------------|
| 1 title                  | RS-0928.2.fid       |
| 2 Origin                 | Bruker BioSpin GmbH |
| 3 Solvent                | CDCl3               |
| 4 Temperature            | 298.0               |
| 5 Number of Scans        | 512                 |
| 6 Acquisition Date       | 2022-09-14T09:28:49 |
| 7 Spectrometer Frequency | 151                 |
| 8 Nucleus                | 13C                 |

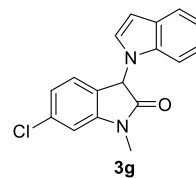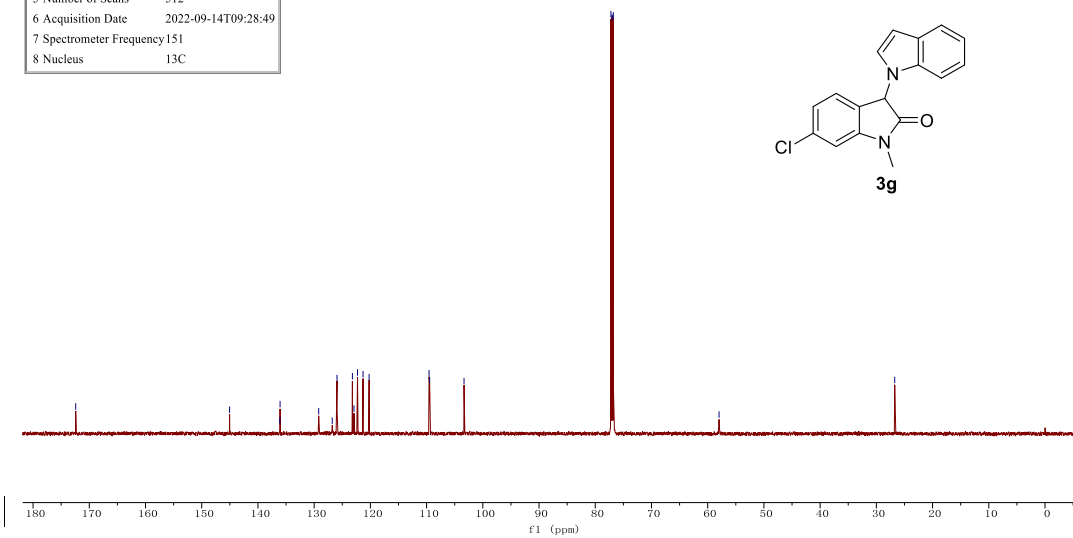

7.638  
7.636  
7.634  
7.625  
7.623  
7.622  
7.188  
7.185  
7.175  
7.172  
7.150  
7.147  
7.137  
7.134  
7.131  
7.121  
7.118  
7.109  
7.042  
7.041  
7.029  
7.007  
7.005  
6.994  
6.992  
6.975  
6.969  
6.572  
6.567  
5.784

| Parameter                | Value               |
|--------------------------|---------------------|
| 1 title                  | RS-0927.1.1.1r      |
| 2 Origin                 | Bruker BioSpin GmbH |
| 3 Solvent                | CDCl3               |
| 4 Temperature            | 298.0               |
| 5 Number of Scans        | 4                   |
| 6 Acquisition Date       | 2022-08-18T15:38:18 |
| 7 Spectrometer Frequency | 600                 |
| 8 Nucleus                | 1H                  |

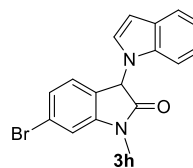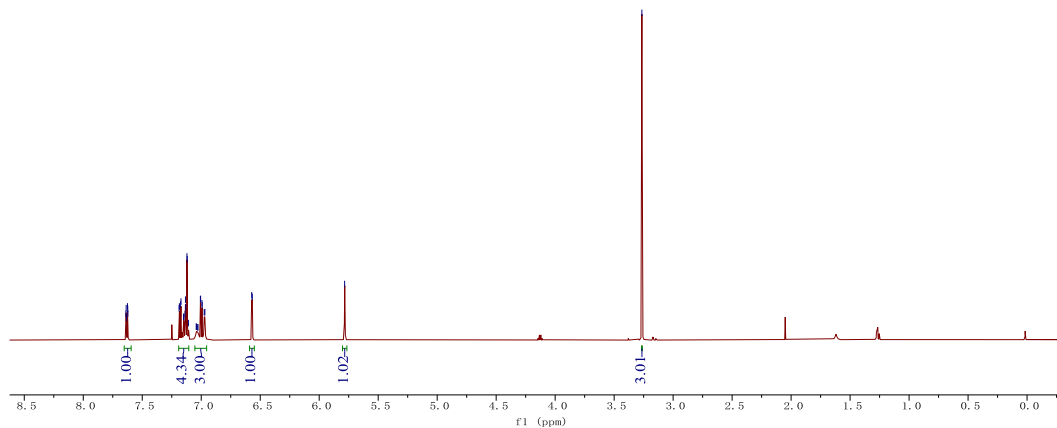

172.230  
145.065  
136.041  
129.123  
126.795  
126.172  
126.078  
123.776  
123.428  
122.232  
121.243  
120.179  
112.286  
109.421  
103.266  
77.212  
77.000  
76.788  
57.963  
26.648

| Parameter                | Value               |
|--------------------------|---------------------|
| 1 title                  | RS-0927.2.fid       |
| 2 Origin                 | Bruker BioSpin GmbH |
| 3 Solvent                | CDCl3               |
| 4 Temperature            | 298.0               |
| 5 Number of Scans        | 95                  |
| 6 Acquisition Date       | 2022-08-21T06:52:28 |
| 7 Spectrometer Frequency | 151                 |
| 8 Nucleus                | 13C                 |

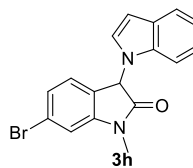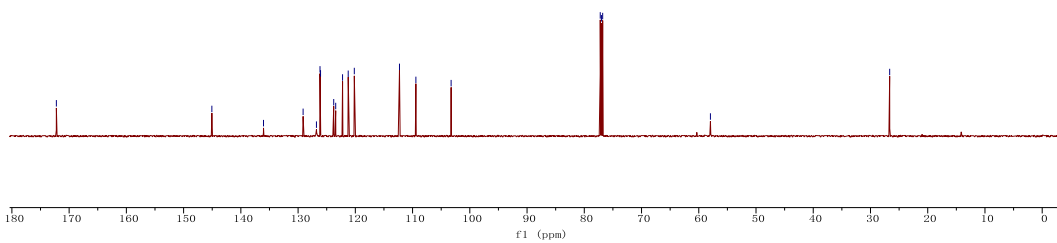

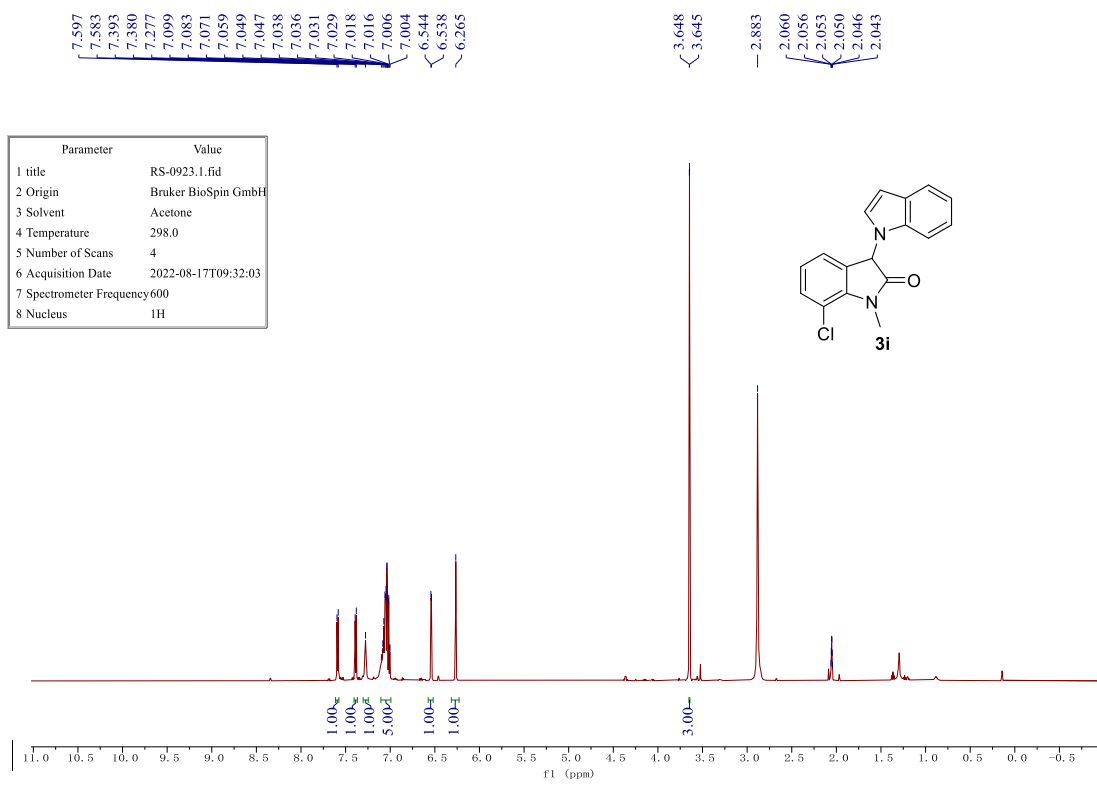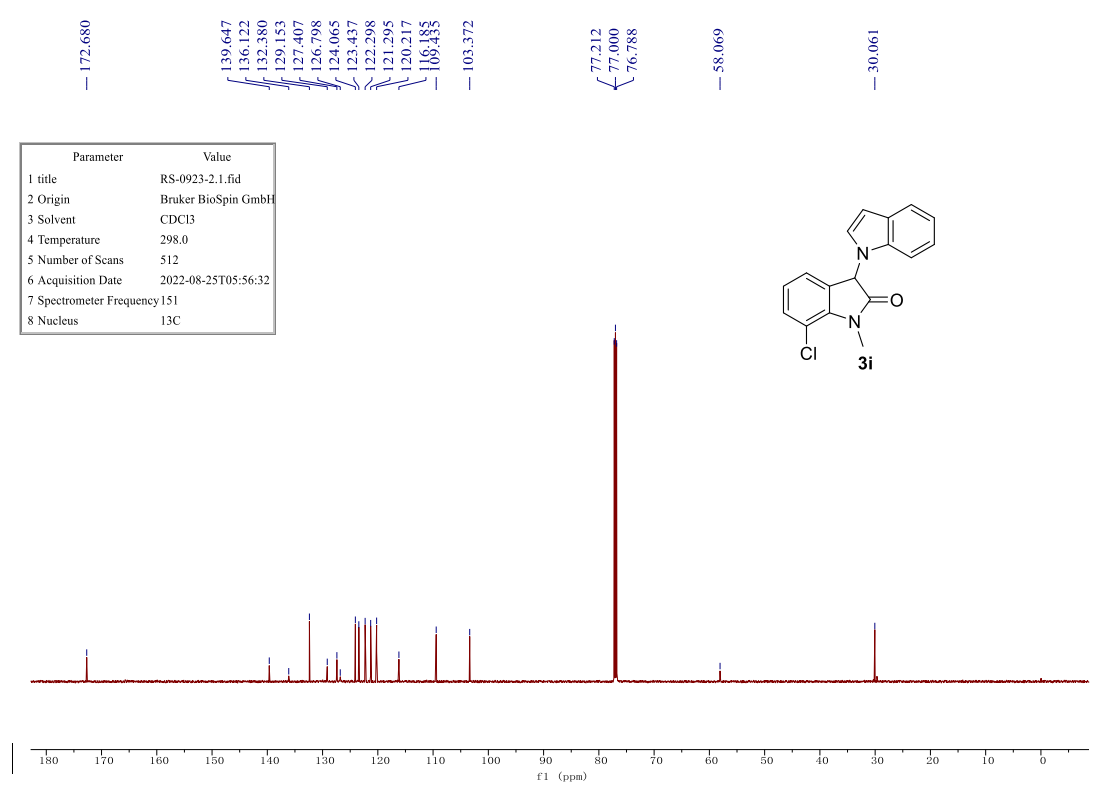

7.668  
7.655  
7.538  
7.524  
7.192  
7.165  
7.163  
7.152  
7.151  
7.092  
7.090  
7.088  
7.080  
7.078  
7.076  
7.007  
6.917  
6.905  
6.903  
6.891  
6.610  
6.609  
6.605  
5.893

3.727

| Parameter                | Value               |
|--------------------------|---------------------|
| 1 title                  | RS-0931.1.fid       |
| 2 Origin                 | Bruker BioSpin GmbH |
| 3 Solvent                | CDCl3               |
| 4 Temperature            | 298.0               |
| 5 Number of Scans        | 4                   |
| 6 Acquisition Date       | 2022-08-25T01:50:31 |
| 7 Spectrometer Frequency | 600                 |
| 8 Nucleus                | <sup>1</sup> H      |

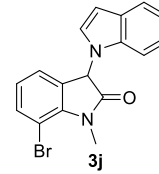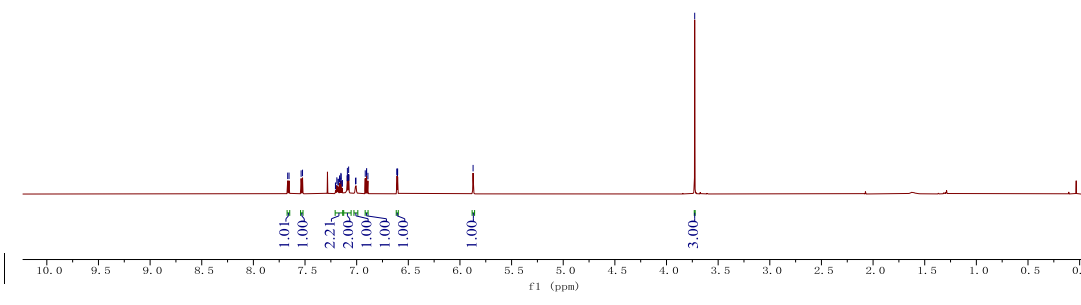

172.857  
141.075  
136.110  
135.707  
129.146  
127.738  
126.801  
124.440  
123.965  
122.306  
121.296  
120.222  
109.432  
103.382  
102.992  
77.211  
77.001  
76.788  
58.044  
30.269

| Parameter                | Value               |
|--------------------------|---------------------|
| 1 title                  | RS-0931.2.fid       |
| 2 Origin                 | Bruker BioSpin GmbH |
| 3 Solvent                | CDCl3               |
| 4 Temperature            | 298.0               |
| 5 Number of Scans        | 512                 |
| 6 Acquisition Date       | 2022-08-25T16:53:28 |
| 7 Spectrometer Frequency | 151                 |
| 8 Nucleus                | <sup>13</sup> C     |

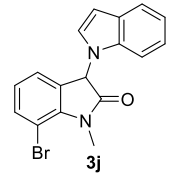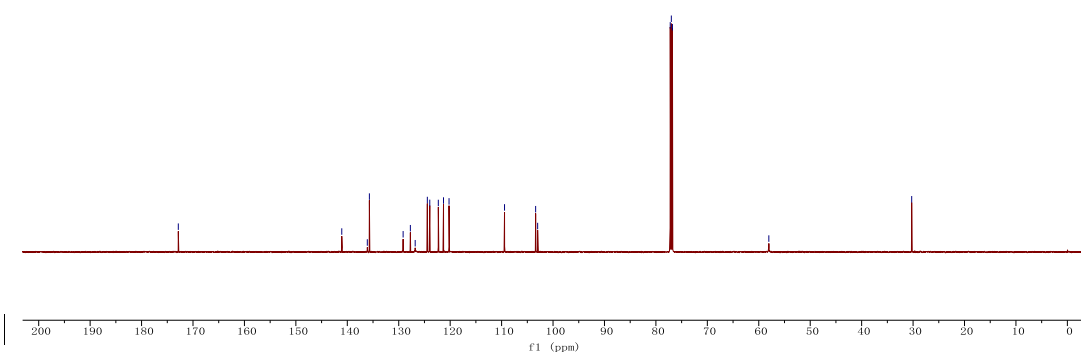

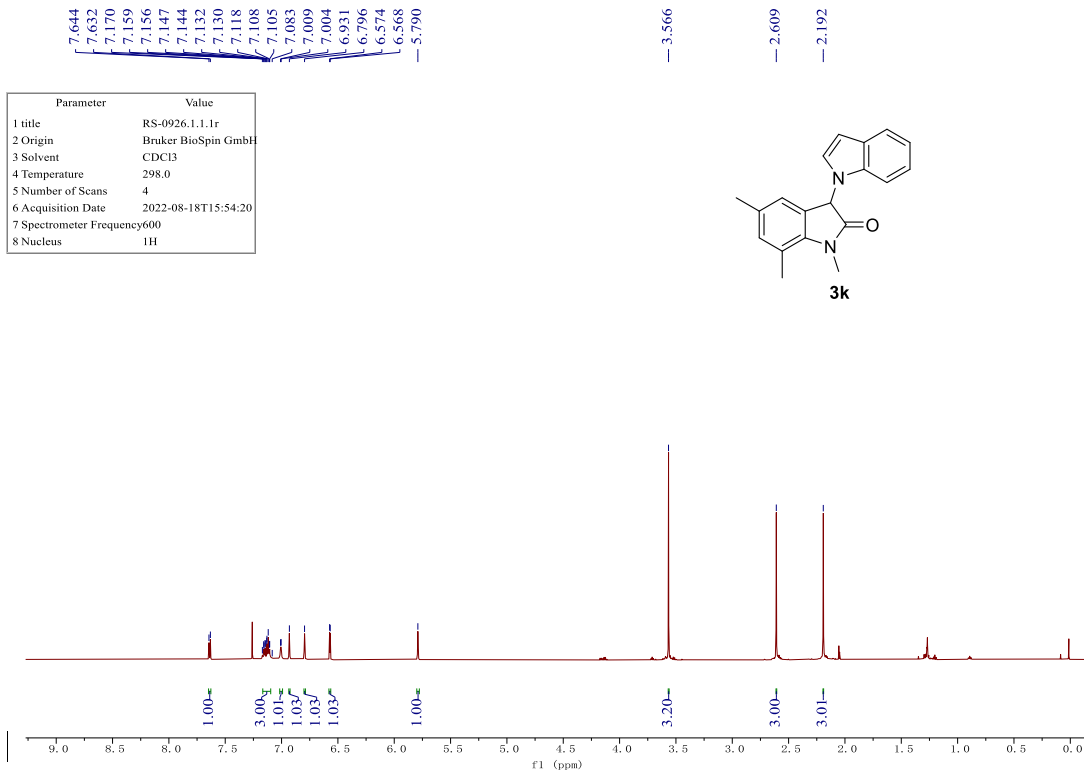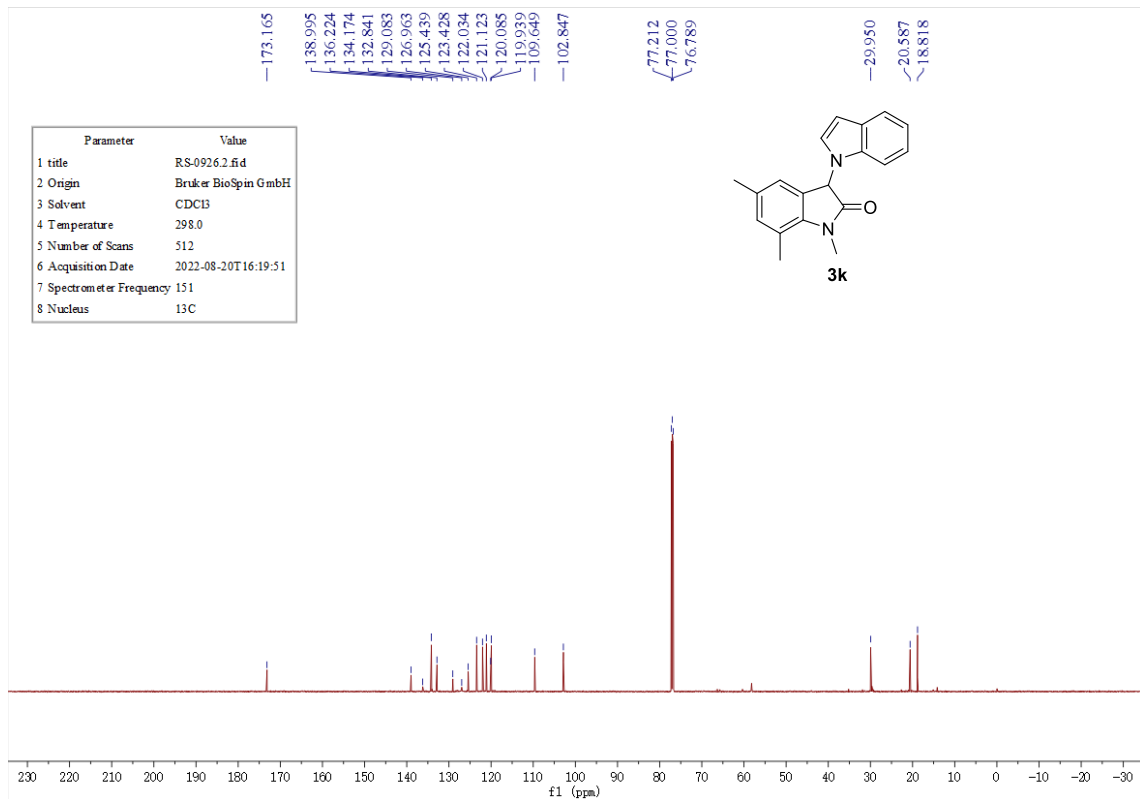

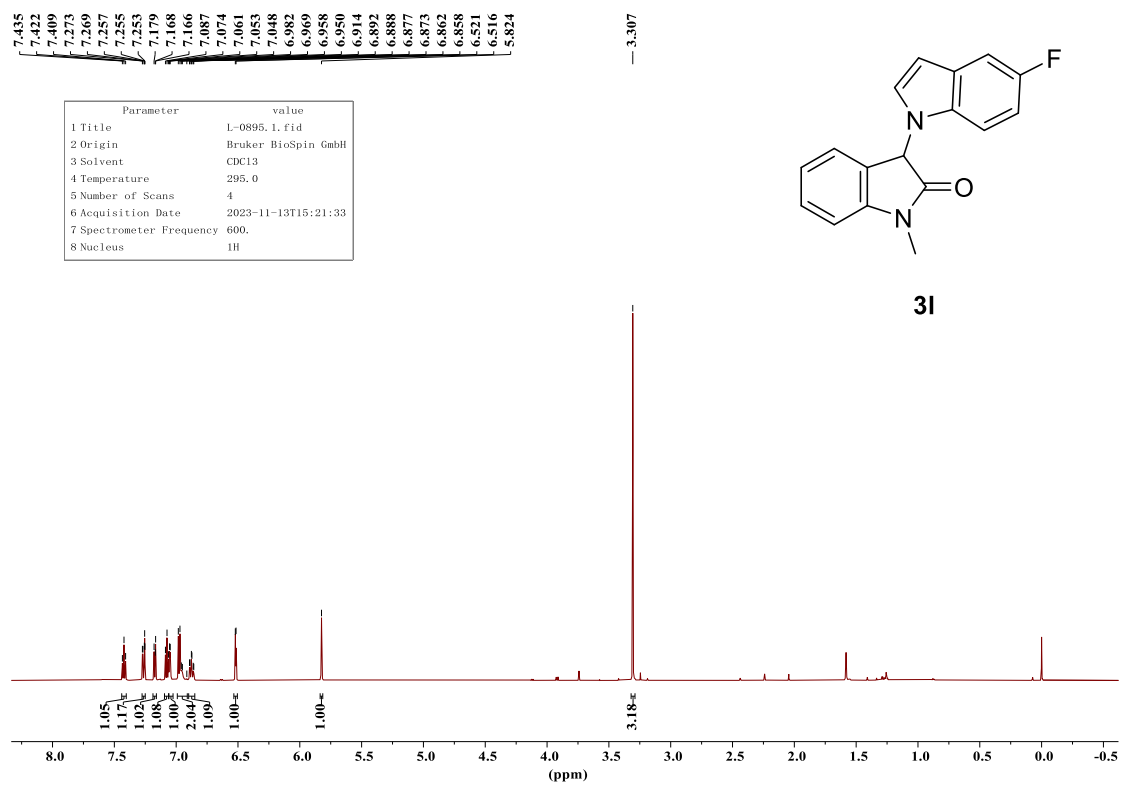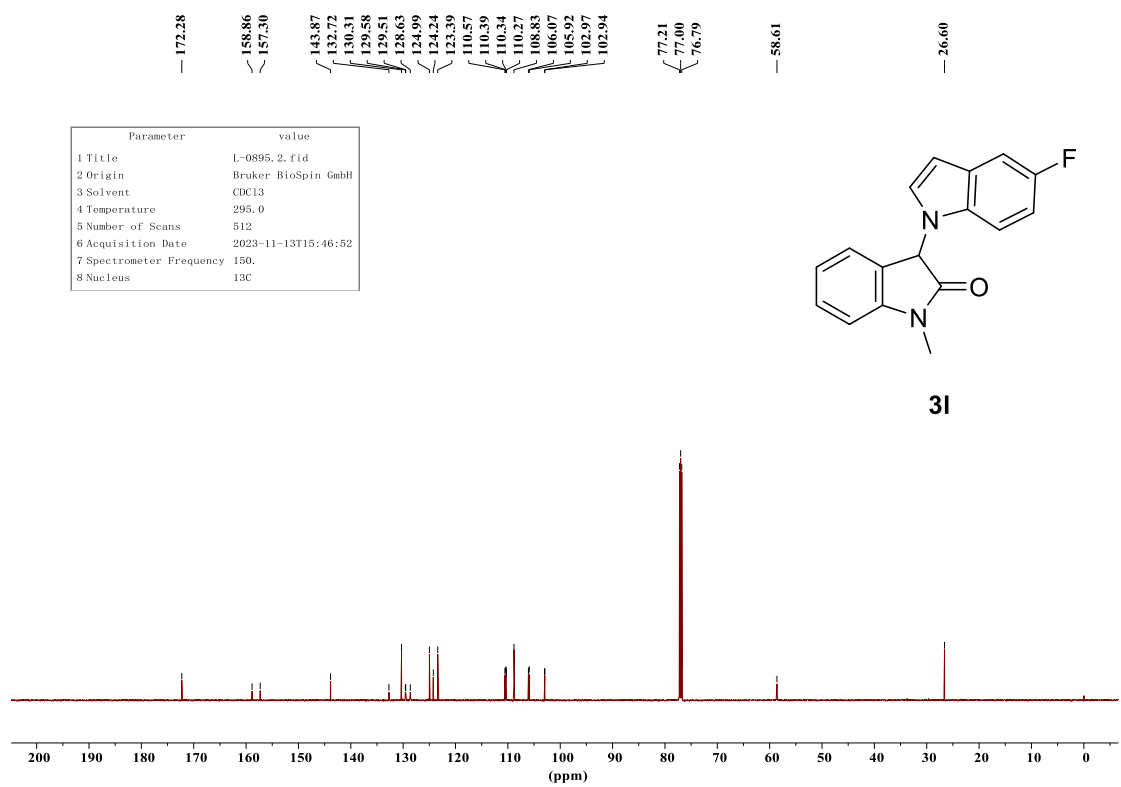



| Parameter                | value               |
|--------------------------|---------------------|
| 1 Title                  | L-0895_3.fid        |
| 2 Origin                 | Bruker BioSpin GmbH |
| 3 Solvent                | CDCl3               |
| 4 Temperature            | 295.2               |
| 5 Number of Scans        | 16                  |
| 6 Acquisition Date       | 2023-11-13T15:48:39 |
| 7 Spectrometer Frequency | 565.                |
| 8 Nucleus                | 19F                 |

-124.64

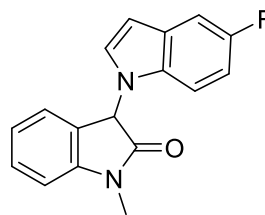

**31**

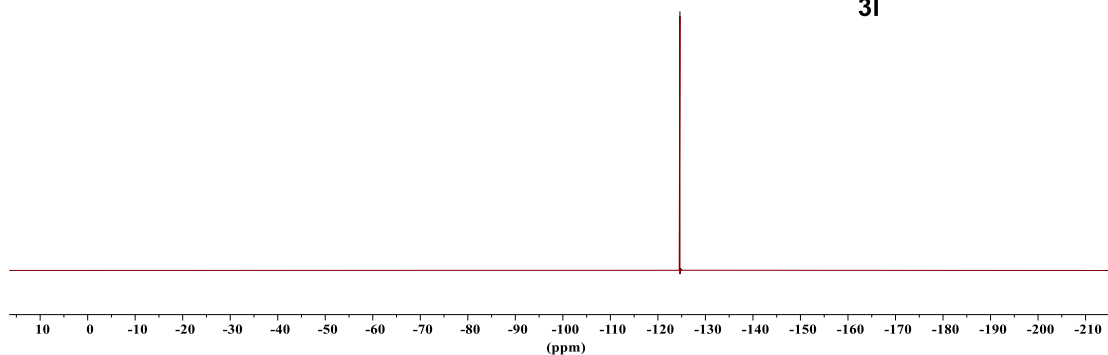

RS-0823.5.fid

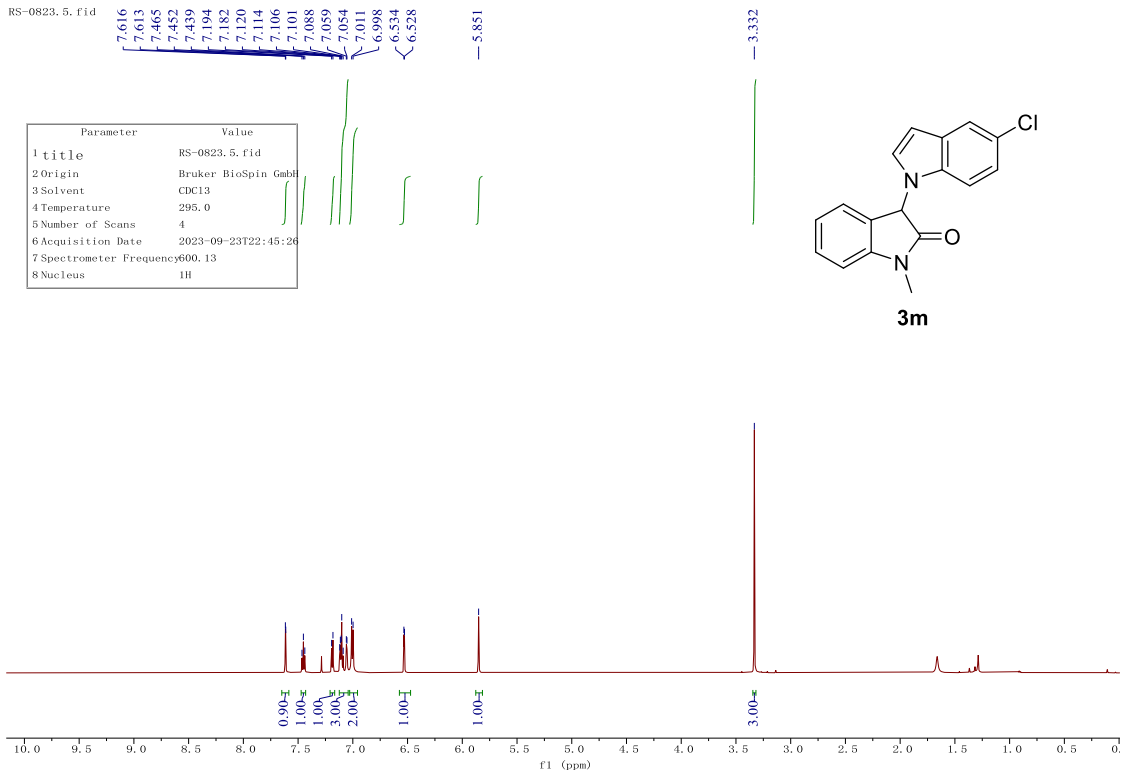

RS-0823.6.fid

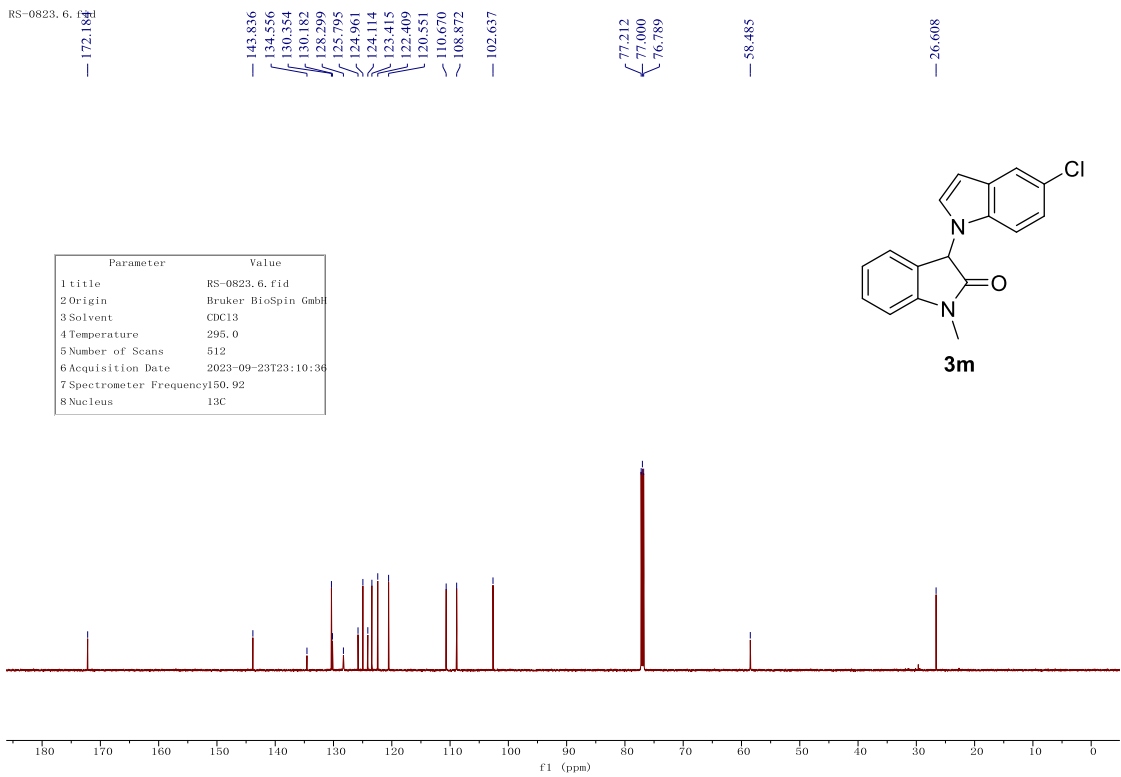

7.412  
7.411  
7.409  
7.407  
7.400  
7.398  
7.396  
7.387  
7.385  
7.383  
7.165  
7.153  
7.056  
7.043  
7.032  
6.971  
6.965  
6.952  
6.908  
6.480  
6.475  
5.829

| Parameter                | value               |
|--------------------------|---------------------|
| 1 Title                  | L-0899-1.1.fid      |
| 2 Origin                 | Bruker BioSpin GmbH |
| 3 Solvent                | CDCl3               |
| 4 Temperature            | 295.0               |
| 5 Number of Scans        | 4                   |
| 6 Acquisition Date       | 2023-11-15T02:14:39 |
| 7 Spectrometer Frequency | 600.                |
| 8 Nucleus                | 1H                  |

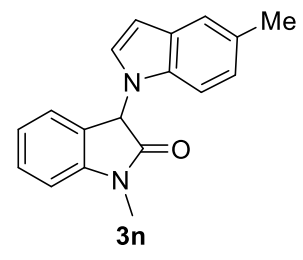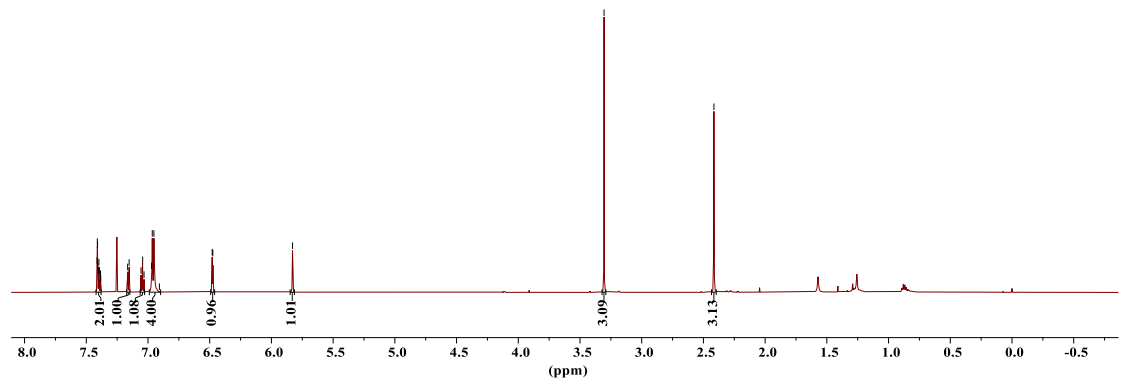

172.54  
143.84  
134.55  
130.07  
129.44  
129.29  
127.05  
124.97  
124.72  
123.69  
123.28  
120.87  
109.24  
108.67  
102.50  
77.21  
77.00  
76.79  
58.47  
26.57  
21.31

| Parameter                | value               |
|--------------------------|---------------------|
| 1 Title                  | L-0899-1.2.fid      |
| 2 Origin                 | Bruker BioSpin GmbH |
| 3 Solvent                | CDCl3               |
| 4 Temperature            | 295.0               |
| 5 Number of Scans        | 512                 |
| 6 Acquisition Date       | 2023-11-15T02:39:54 |
| 7 Spectrometer Frequency | 150.                |
| 8 Nucleus                | 13C                 |

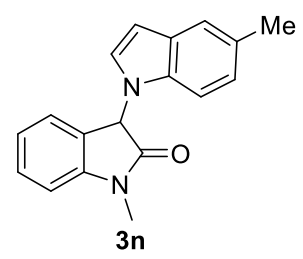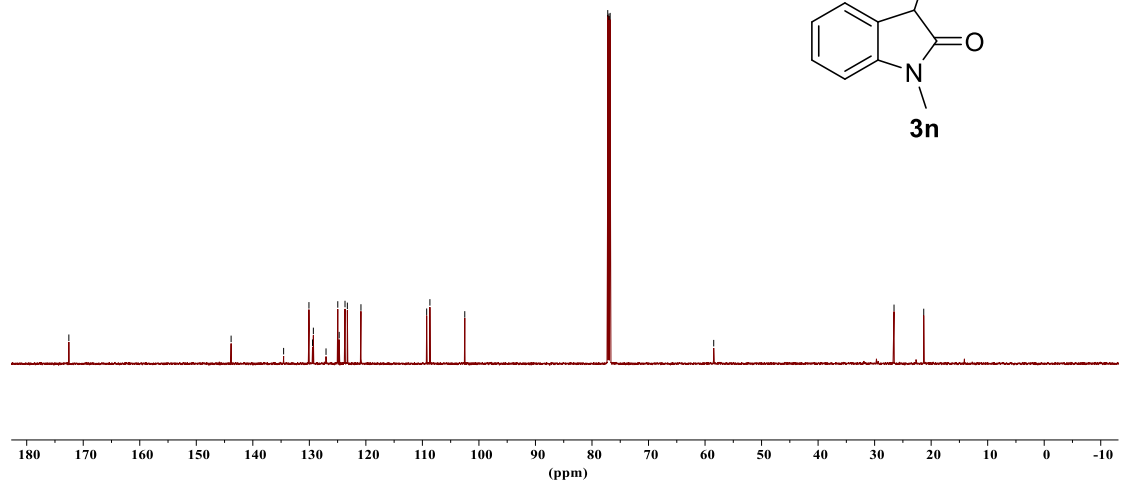

7.661  
7.660  
7.651  
7.648  
7.397  
7.385  
7.373  
7.361  
7.361  
7.348  
7.328  
7.316  
7.301  
7.288  
7.183  
7.171  
7.144  
7.141  
7.132  
7.130  
7.121  
7.117  
7.109  
7.097  
7.058  
7.052  
7.034  
7.021  
7.009  
6.909  
6.896  
6.605  
6.600  
5.963  
5.075  
5.049  
4.946  
4.930  
4.920

| Parameter                | Value               |
|--------------------------|---------------------|
| 1 title                  | RS-0933.1.fid       |
| 2 Origin                 | Bruker BioSpin GmbH |
| 3 Solvent                | CDCl3               |
| 4 Temperature            | 298.0               |
| 5 Number of Scans        | 8                   |
| 6 Acquisition Date       | 2022-09-03T17:35:03 |
| 7 Spectrometer Frequency | 600                 |
| 8 Nucleus                | 1H                  |

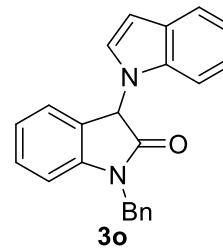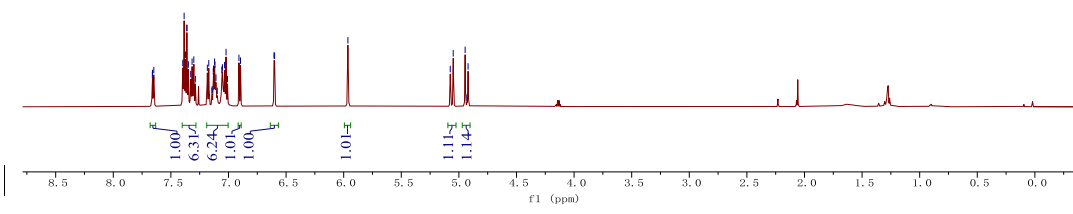

10.886  
7.589  
7.587  
7.581  
7.578  
7.574  
7.341  
7.335  
7.333  
7.331  
7.322  
7.320  
7.318  
7.309  
7.307  
7.305  
7.036  
7.034  
7.030  
7.015  
7.005  
7.005  
7.002  
6.968  
6.967  
6.956  
6.954  
6.943  
6.942  
6.530  
6.524  
6.363

3.382  
2.506  
2.503  
2.500  
2.497  
2.494

| Parameter              | Value               |
|------------------------|---------------------|
| title                  | LRS-0901.1.fid      |
| Origin                 | Bruker BioSpin GmbH |
| Solvent                | DMSO                |
| Temperature            | 295.0               |
| Number of Scans        | 4                   |
| Acquisition Date       | 2023-09-19T10:01:00 |
| Spectrometer Frequency | 600.13              |
| Nucleus                | <sup>1</sup> H      |

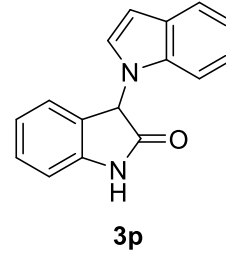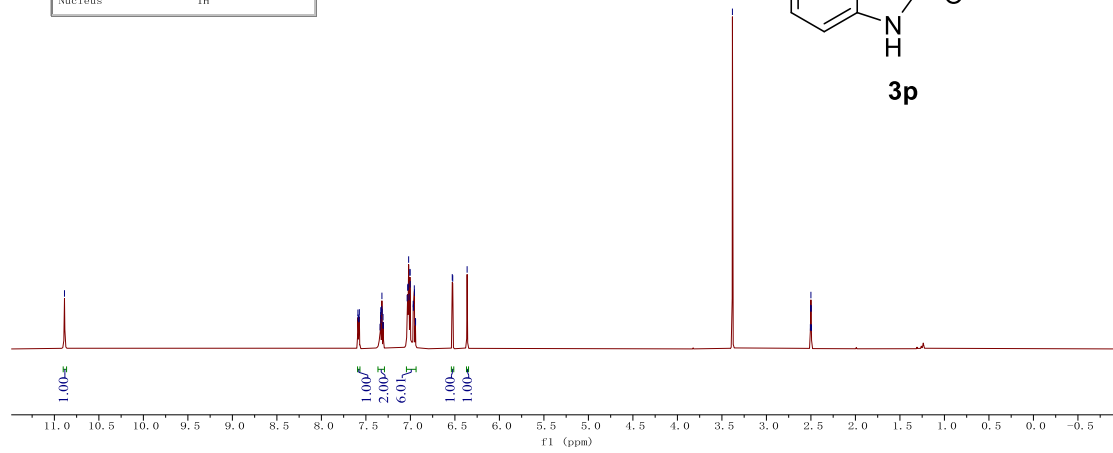

LRS-0901.2.fid

174.186  
142.158  
135.553  
129.704  
128.720  
125.861  
124.437  
122.220  
121.501  
120.749  
119.554  
110.298  
109.886  
101.835

58.785  
39.918  
39.778  
39.639  
39.500  
39.362  
39.222  
39.083

| Parameter                | value               |
|--------------------------|---------------------|
| 1 title                  | LRS-0901.2.fid      |
| 2 Origin                 | Bruker BioSpin GmbH |
| 3 Solvent                | DMSO                |
| 4 Temperature            | 295.0               |
| 5 Number of Scans        | 512                 |
| 6 Acquisition Date       | 2023-09-20T15:34:50 |
| 7 Spectrometer Frequency | 150.92              |
| 8 Nucleus                | <sup>13</sup> C     |

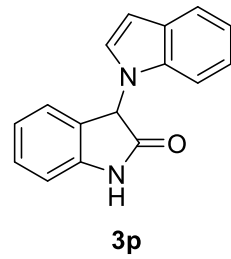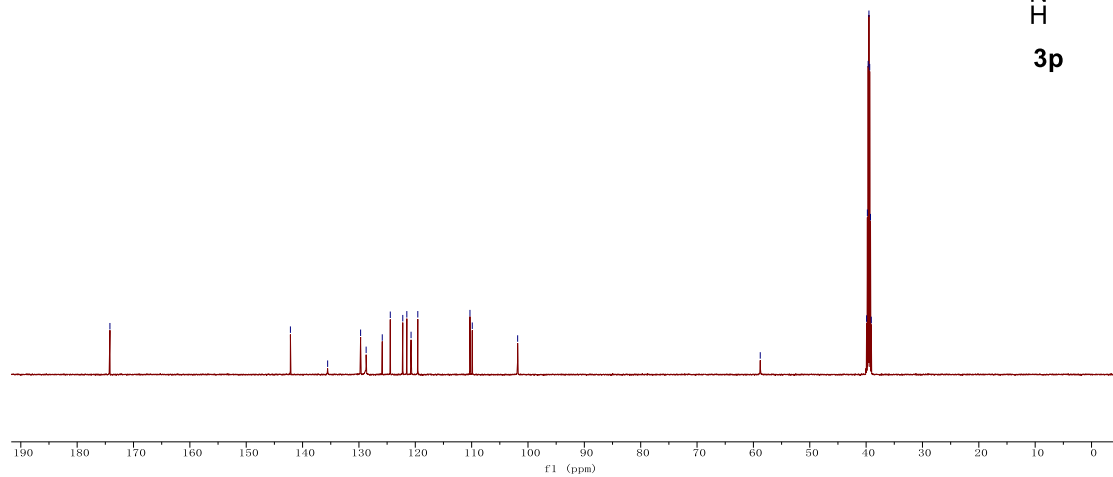

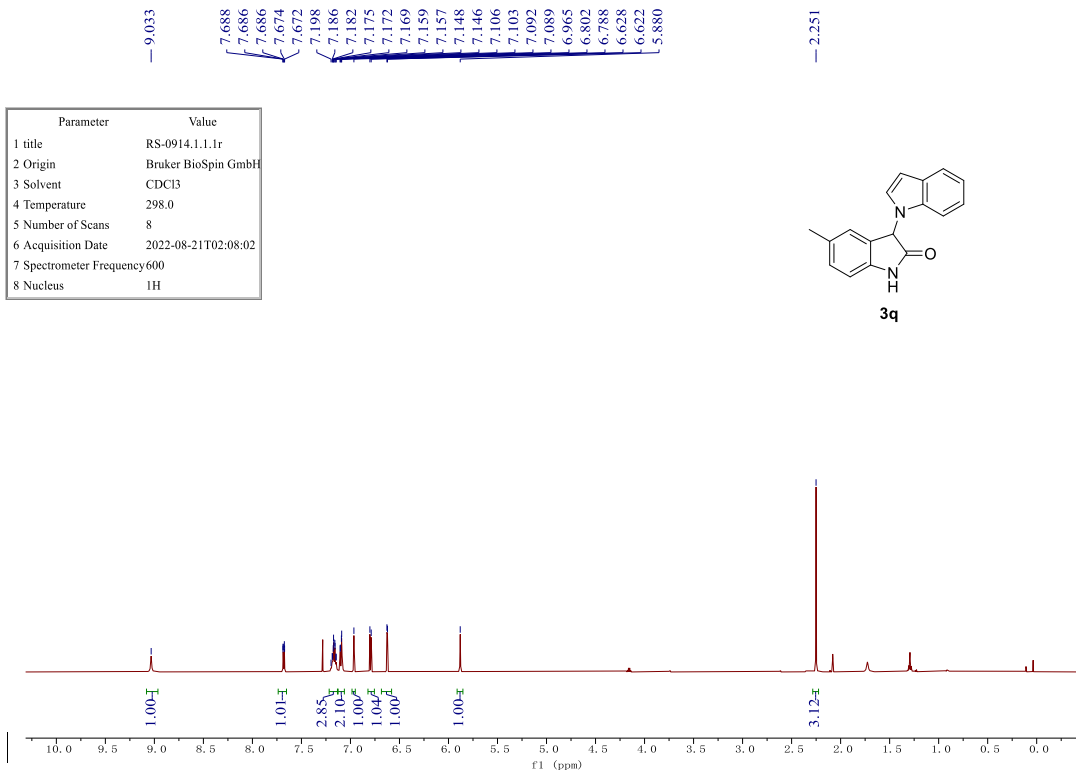

<sup>1</sup>H NMR (600 MHz, Chloroform-d)  $\delta$  6.73 (d,  $J = 1.9$  Hz, 1H), 6.69-6.62 (m, 7H), 3.689 (s, 3H).

| Parameter                | Value               |
|--------------------------|---------------------|
| 1 title                  | RS-0902.1.fid       |
| 2 Origin                 | Bruker BioSpin GmbH |
| 3 Solvent                | CDCl3               |
| 4 Temperature            | 298.0               |
| 5 Number of Scans        | 4                   |
| 6 Acquisition Date       | 2022-08-09T19:06:33 |
| 7 Spectrometer Frequency | 600                 |
| 8 Nucleus                | <sup>1</sup> H      |

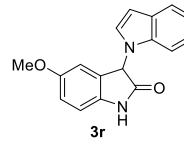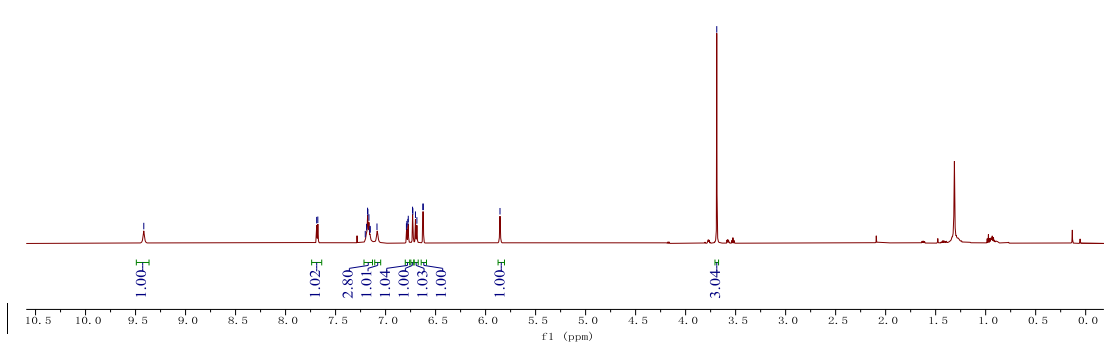

RS-0838-1.1.fid

9.167

7.680  
7.668  
7.665  
7.286  
7.197  
7.187  
7.184  
7.177  
7.174  
7.165  
7.162  
7.152  
7.147  
7.142  
7.102  
7.099  
7.071  
7.066  
7.015  
7.010  
7.000  
6.996  
6.985  
6.981  
6.904  
6.891  
6.887  
6.806  
6.799  
6.785  
6.631  
6.626  
5.892

| Parameter                | value               |
|--------------------------|---------------------|
| 1 title                  | RS-0838-1.1.fid     |
| 2 Origin                 | Bruker BioSpin GmbH |
| 3 Solvent                | CDCl3               |
| 4 Temperature            | 295.0               |
| 5 Number of Scans        | 4                   |
| 6 Acquisition Date       | 2023-10-20T19:21:56 |
| 7 Spectrometer Frequency | 600.13              |
| 8 Nucleus                | 1H                  |

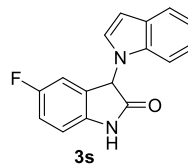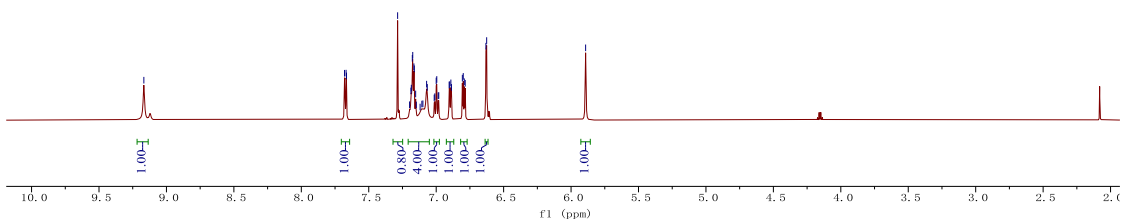

RS-0838-1.2.fid

-118.777

| Parameter                | 值                   |
|--------------------------|---------------------|
| 1 标题                     | RS-0838-1.2.fid     |
| 2 Origin                 | Bruker BioSpin GmbH |
| 3 Solvent                | CDCl3               |
| 4 Temperature            | 295.2               |
| 5 Number of Scans        | 16                  |
| 6 Acquisition Date       | 2023-10-21T22:01:57 |
| 7 Spectrometer Frequency | 564.63              |
| 8 Nucleus                | 19F                 |

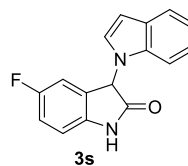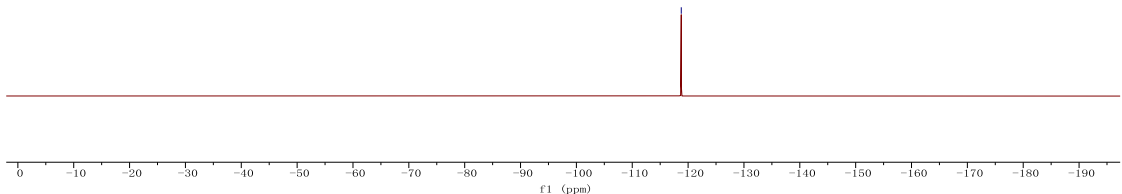



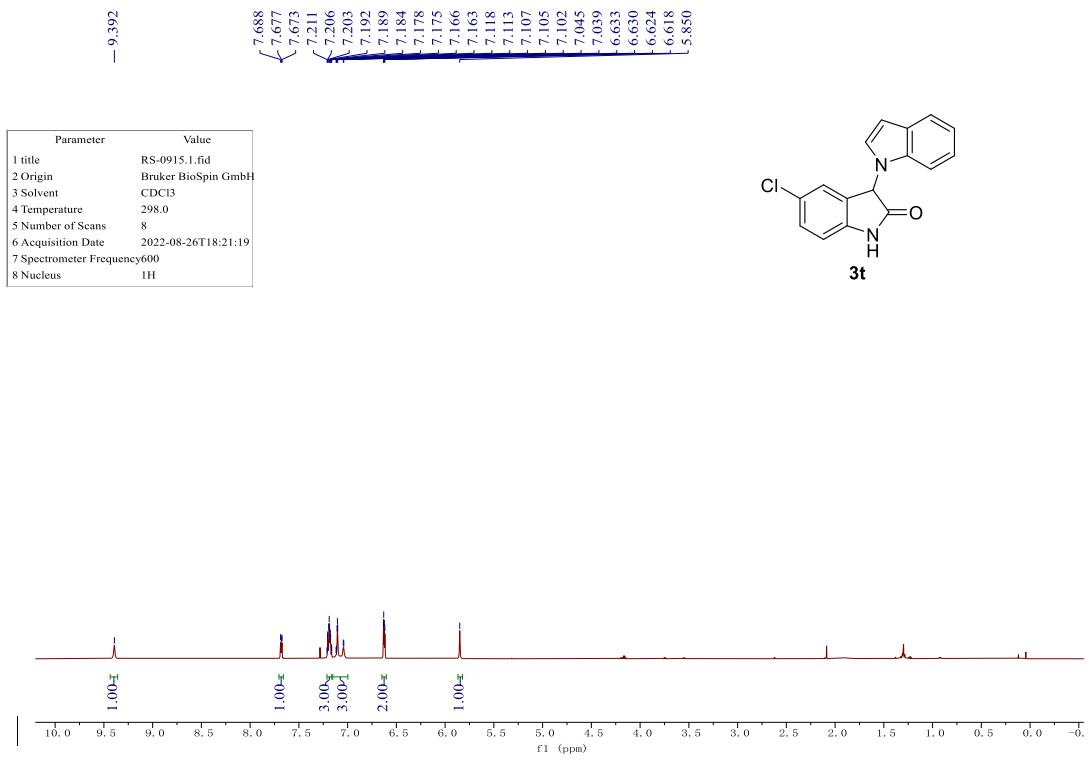

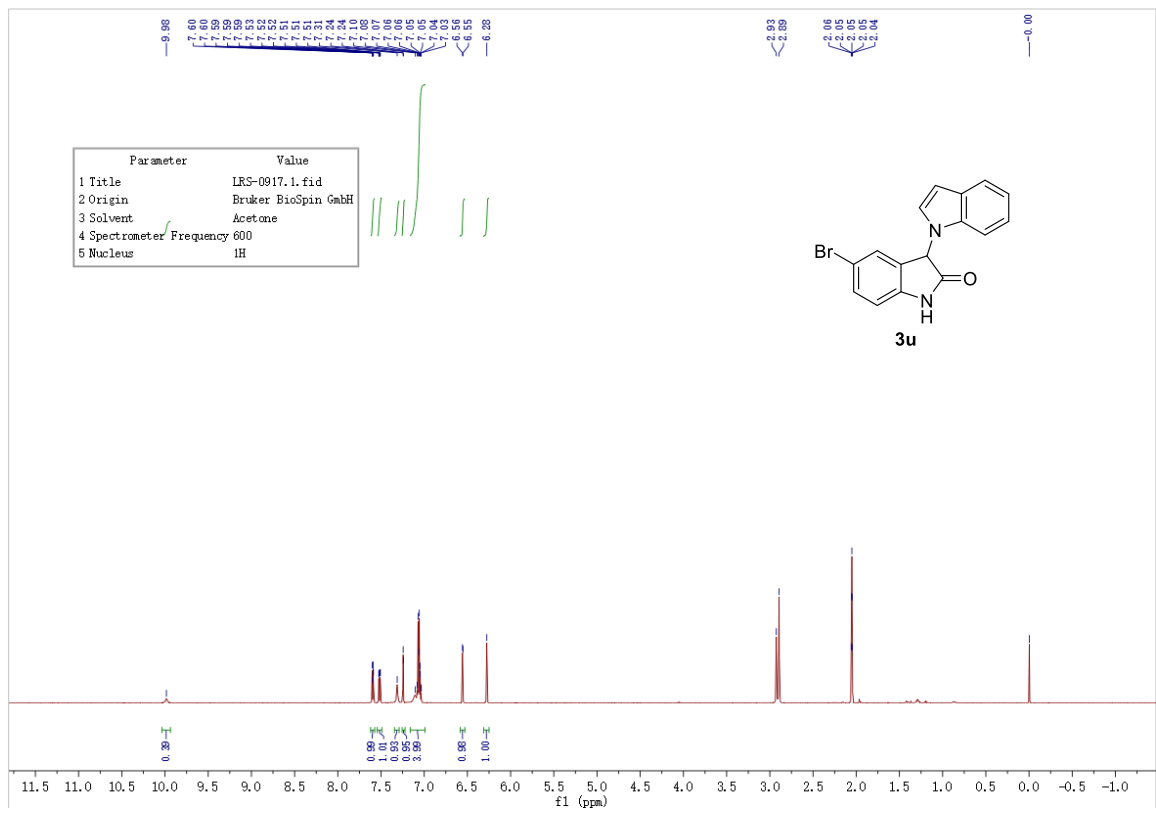

RS-0822.1.fid

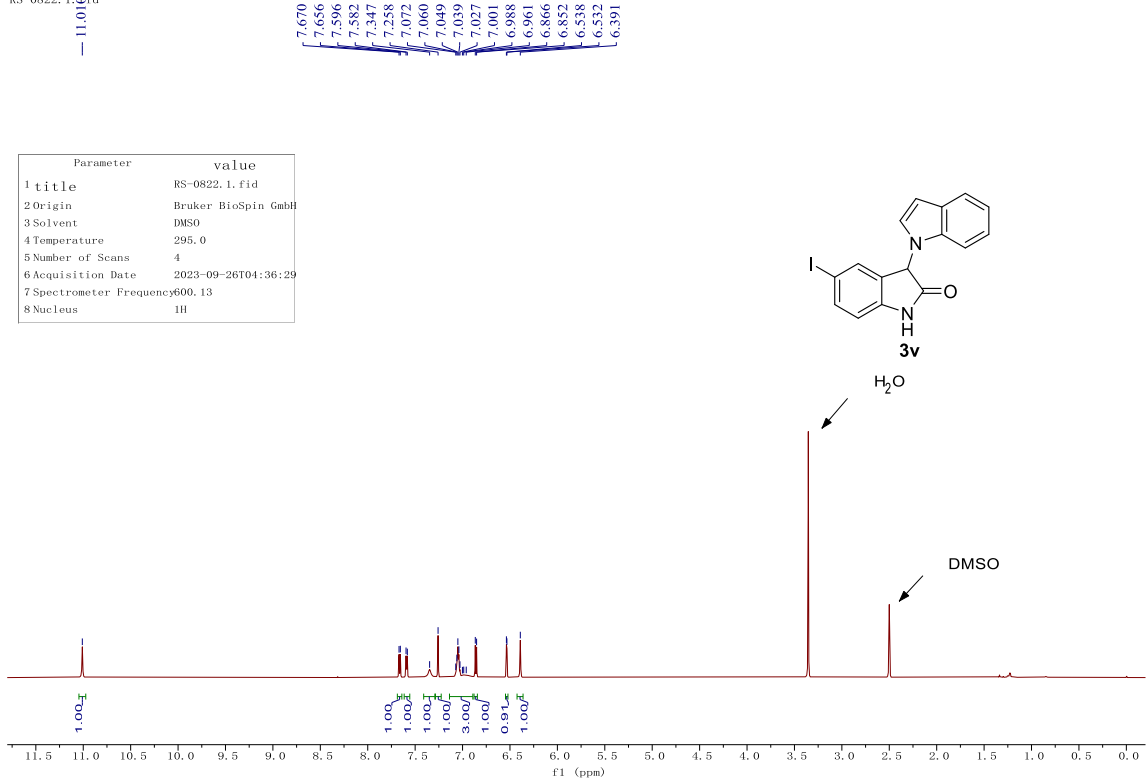

RS-0822.2.fid

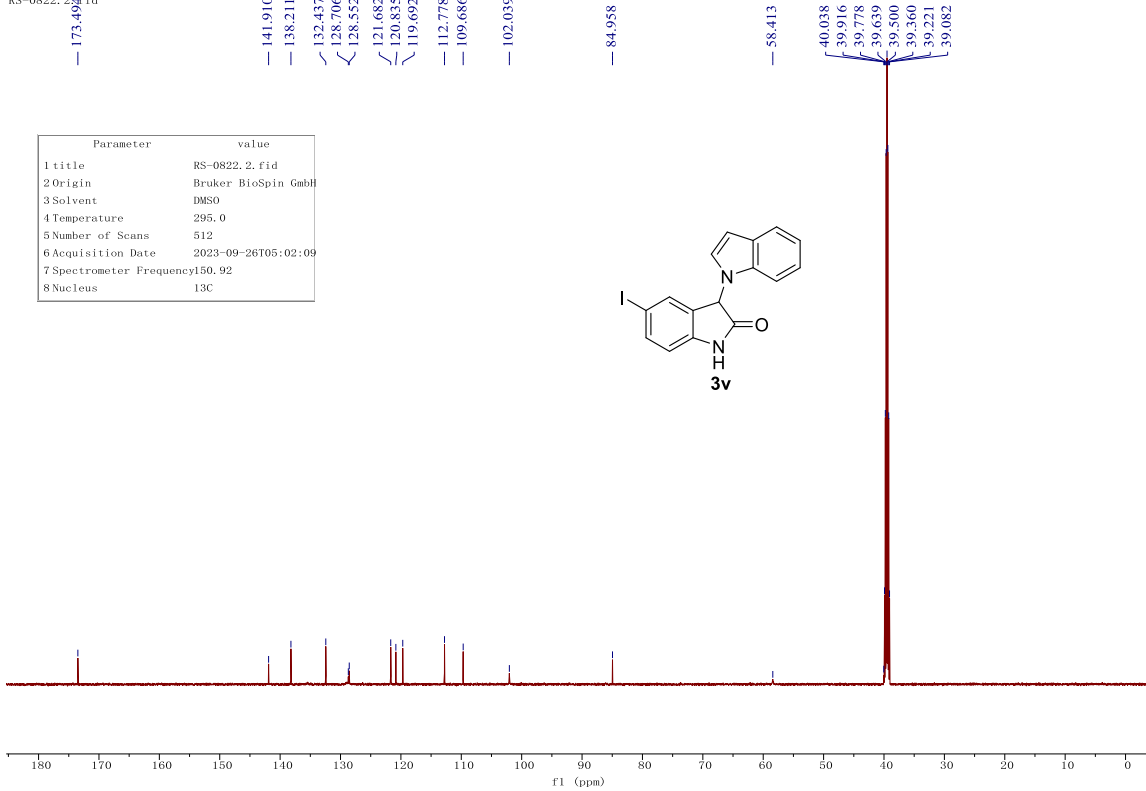

9.034  
 7.672  
 7.660  
 7.191  
 7.179  
 7.168  
 7.159  
 7.146  
 7.136  
 7.133  
 7.076  
 7.071  
 7.058  
 7.045  
 6.609  
 6.604  
 6.555  
 6.552  
 6.541  
 6.538  
 6.534  
 6.532  
 6.528  
 5.867

3.797

| Parameter                | Value               |
|--------------------------|---------------------|
| 1 title                  | RS-0916.1.fid       |
| 2 Origin                 | Bruker BioSpin GmbH |
| 3 Solvent                | CDCl3               |
| 4 Temperature            | 298.0               |
| 5 Number of Scans        | 8                   |
| 6 Acquisition Date       | 2022-08-16T11:18:11 |
| 7 Spectrometer Frequency | 600                 |
| 8 Nucleus                | <sup>1</sup> H      |

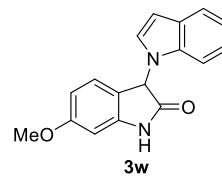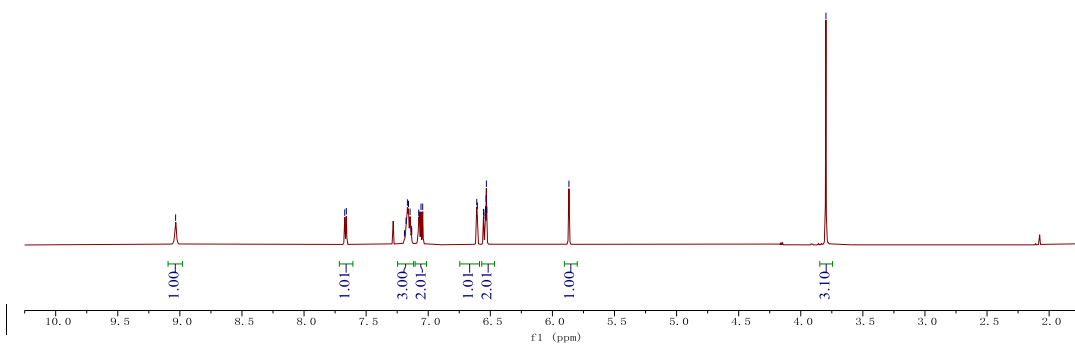

175.825  
 161.447  
 142.305  
 136.125  
 129.196  
 127.015  
 126.116  
 122.166  
 121.213  
 120.108  
 116.646  
 109.737  
 108.310  
 103.003  
 97.846  
 77.211  
 77.000  
 76.787  
 58.604  
 55.551

| Parameter                | Value               |
|--------------------------|---------------------|
| 1 title                  | RS-0916.2.fid       |
| 2 Origin                 | Bruker BioSpin GmbH |
| 3 Solvent                | CDCl3               |
| 4 Temperature            | 298.0               |
| 5 Number of Scans        | 512                 |
| 6 Acquisition Date       | 2022-08-16T11:43:33 |
| 7 Spectrometer Frequency | 151                 |
| 8 Nucleus                | <sup>13</sup> C     |

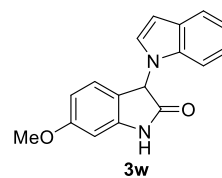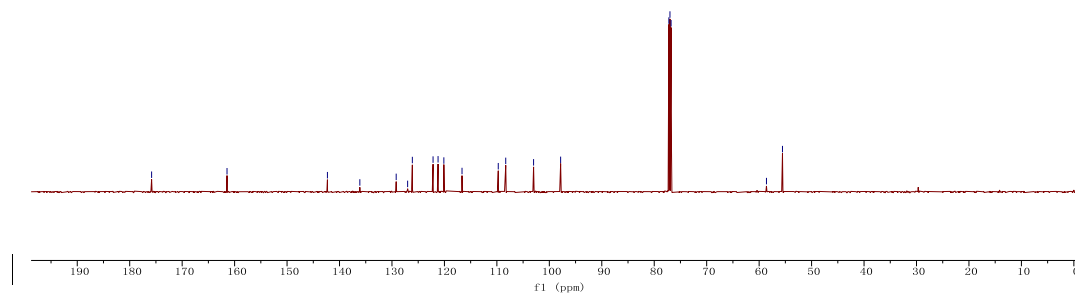

8.640  
 7.673  
 7.661  
 7.199  
 7.187  
 7.175  
 7.169  
 7.156  
 7.144  
 7.111  
 7.104  
 7.101  
 7.090  
 7.076  
 7.052  
 7.047  
 7.041  
 7.038  
 7.028  
 7.025  
 6.974  
 6.627  
 6.621  
 5.878

| Parameter                | Value               |
|--------------------------|---------------------|
| 1 title                  | RS-0907.1.fid       |
| 2 Origin                 | Bruker BioSpin GmbH |
| 3 Solvent                | CDCl3               |
| 4 Temperature            | 298.0               |
| 5 Number of Scans        | 4                   |
| 6 Acquisition Date       | 2022-08-09T19:03:22 |
| 7 Spectrometer Frequency | 600                 |
| 8 Nucleus                | <sup>1</sup> H      |

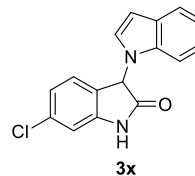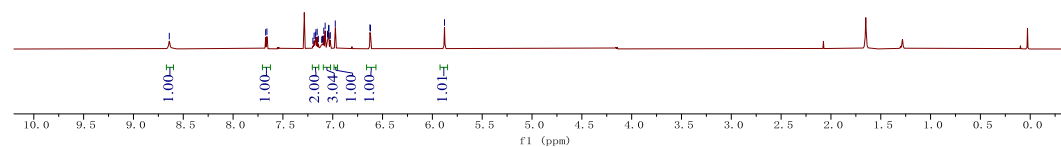

174.485  
 141.893  
 135.944  
 126.293  
 123.459  
 123.369  
 122.387  
 121.383  
 120.349  
 111.346  
 109.488  
 103.494  
 77.212  
 77.000  
 76.789

| Parameter                | Value               |
|--------------------------|---------------------|
| 1 title                  | RS-0907.2.fid       |
| 2 Origin                 | Bruker BioSpin GmbH |
| 3 Solvent                | CDCl3               |
| 4 Temperature            | 298.0               |
| 5 Number of Scans        | 512                 |
| 6 Acquisition Date       | 2022-08-27T15:05:08 |
| 7 Spectrometer Frequency | 151                 |
| 8 Nucleus                | <sup>13</sup> C     |

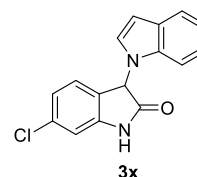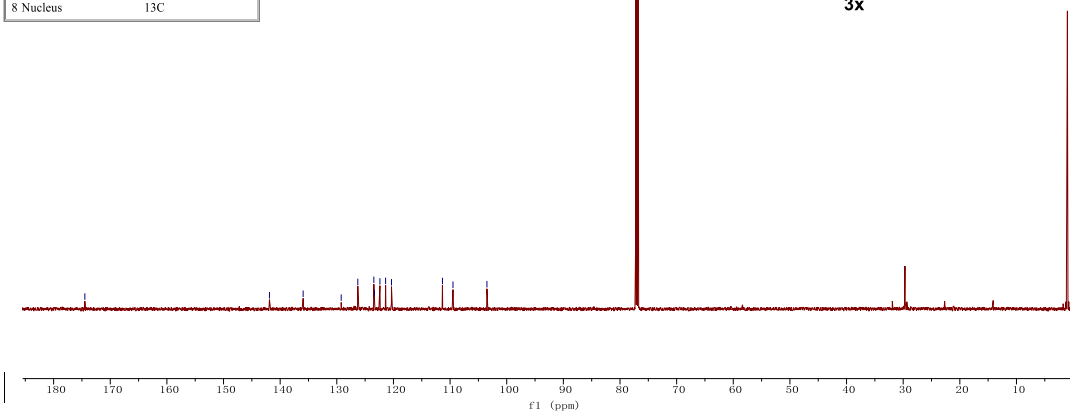

LRS-0825\_1.fid  
 11.026  
 7.598  
 7.596  
 7.586  
 7.584  
 7.582  
 7.520  
 7.518  
 7.516  
 7.515  
 7.506  
 7.504  
 7.503  
 7.501  
 7.353  
 7.143  
 7.072  
 7.062  
 7.059  
 7.053  
 7.049  
 7.040  
 7.038  
 7.028  
 7.026  
 6.980  
 6.966  
 6.541  
 6.540  
 6.535  
 6.534  
 6.416

2.503  
 2.500  
 2.497

| Parameter                | value               |
|--------------------------|---------------------|
| 1 title                  | LRS-0825_1.fid      |
| 2 Origin                 | Bruker BioSpin GmbH |
| 3 Solvent                | DMSO                |
| 4 Temperature            | 295.0               |
| 5 Number of Scans        | 4                   |
| 6 Acquisition Date       | 2023-10-15T17:30:18 |
| 7 Spectrometer Frequency | 600.13              |
| 8 Nucleus                | 1H                  |

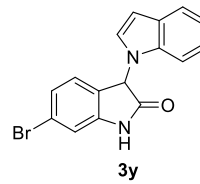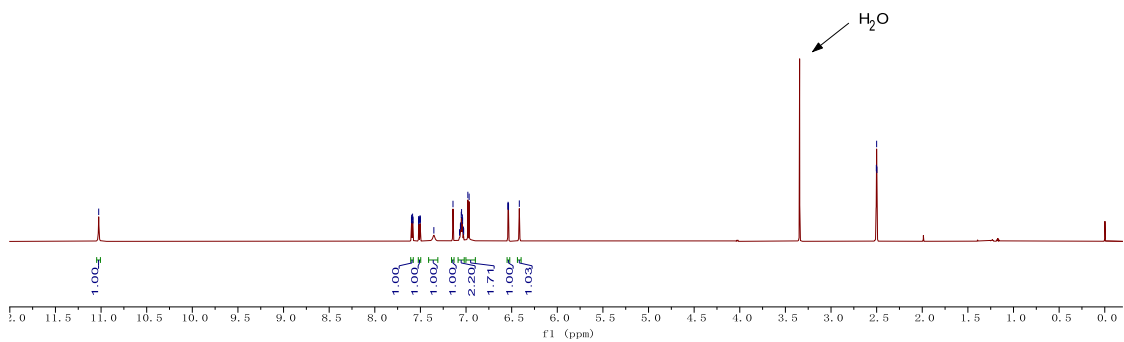

LRS-0825\_2.fid

173.695

141.493

132.440

128.721

128.292

127.045

121.677

120.850

119.691

113.768

112.319

109.679

102.057

58.622

39.915

39.776

39.638

39.499

39.360

39.220

39.081

| Parameter                | value               |
|--------------------------|---------------------|
| 1 title                  | LRS-0825_2.fid      |
| 2 Origin                 | Bruker BioSpin GmbH |
| 3 Solvent                | DMSO                |
| 4 Temperature            | 295.0               |
| 5 Number of Scans        | 512                 |
| 6 Acquisition Date       | 2023-10-15T17:55:29 |
| 7 Spectrometer Frequency | 150.92              |
| 8 Nucleus                | 13C                 |

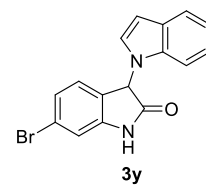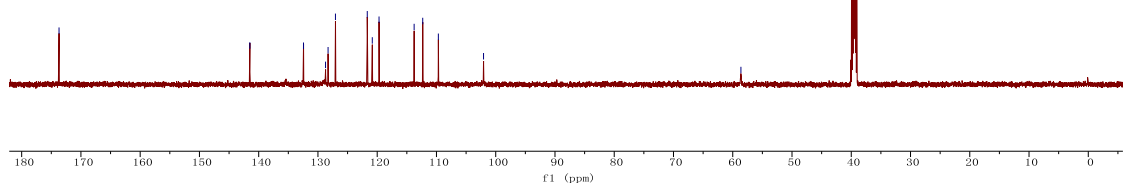

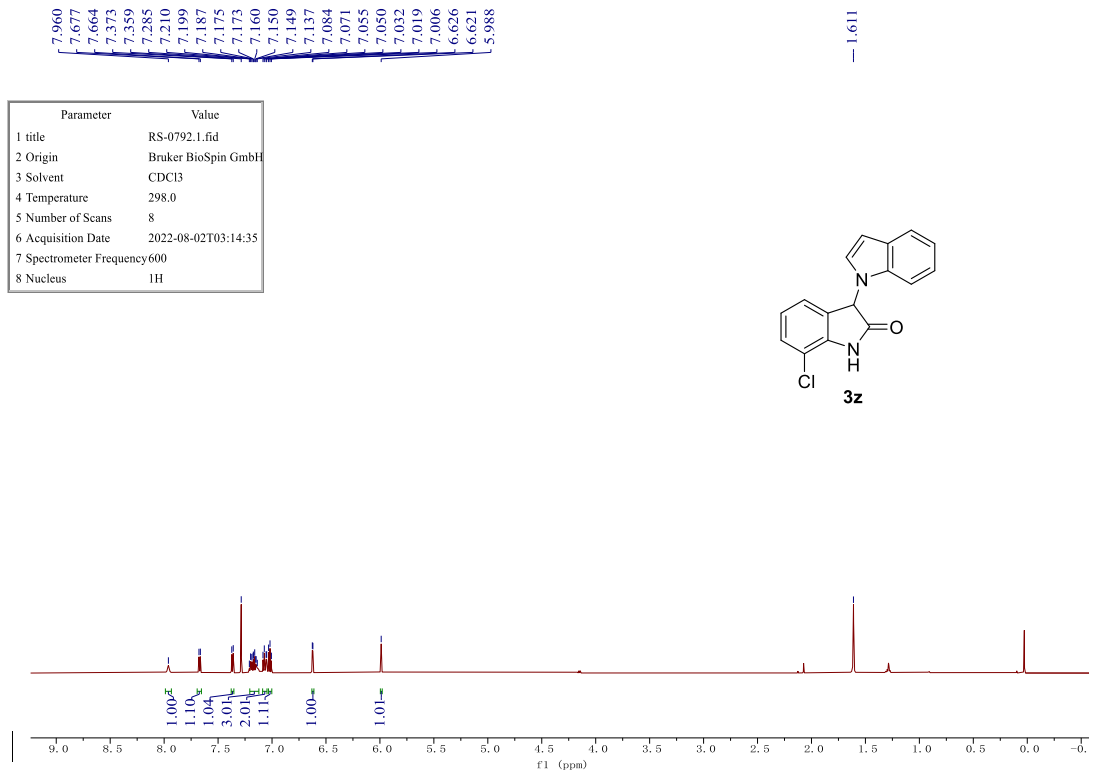

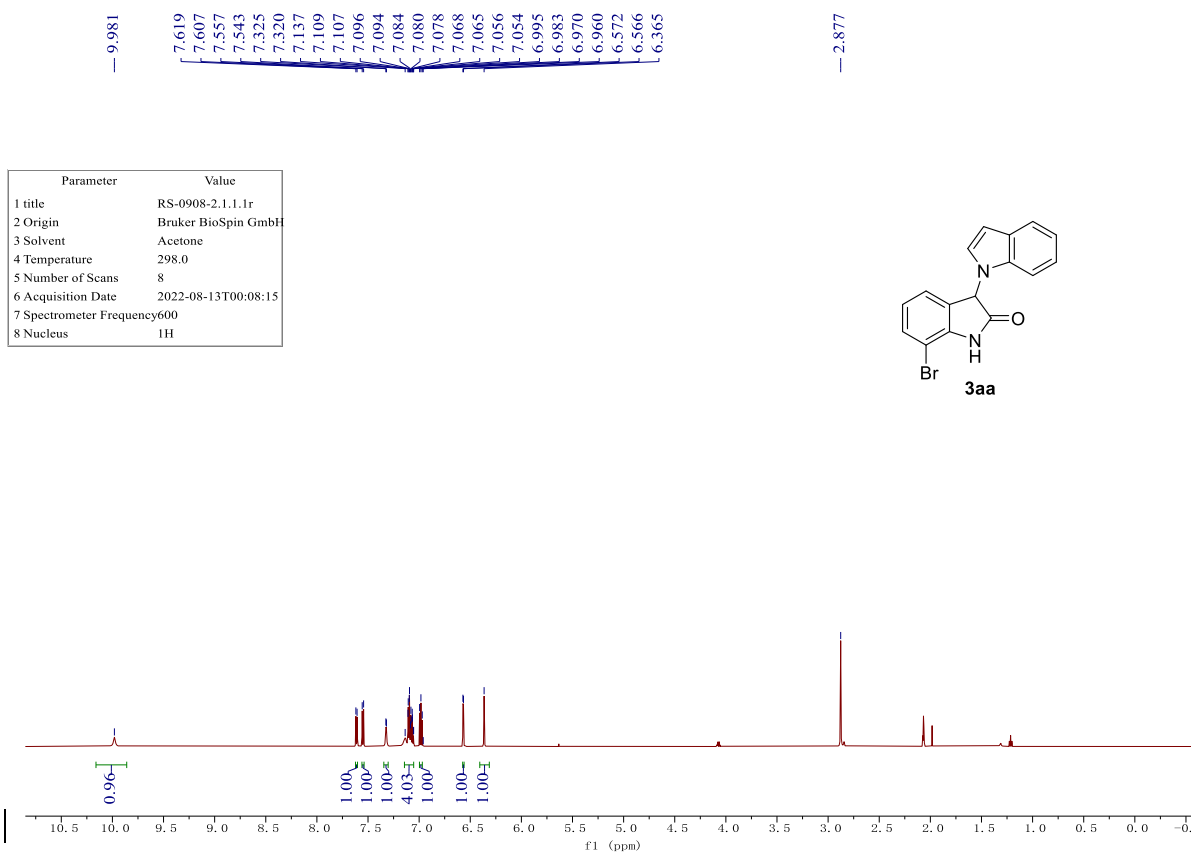



LRS-0905.1.fid

8.851  
7.681  
7.668  
7.167  
7.160  
7.154  
7.147  
7.141  
7.134  
7.089  
7.084  
6.956  
6.805  
6.615  
6.610  
5.900

| Parameter                | value               |
|--------------------------|---------------------|
| 1 title                  | LRS-0905.1.fid      |
| 2 Origin                 | Bruker BioSpin GmbH |
| 3 Solvent                | CDCl3               |
| 4 Temperature            | 295.0               |
| 5 Number of Scans        | 4                   |
| 6 Acquisition Date       | 2023-10-09T17:08:36 |
| 7 Spectrometer Frequency | 600.13              |
| 8 Nucleus                | 1H                  |

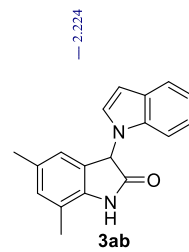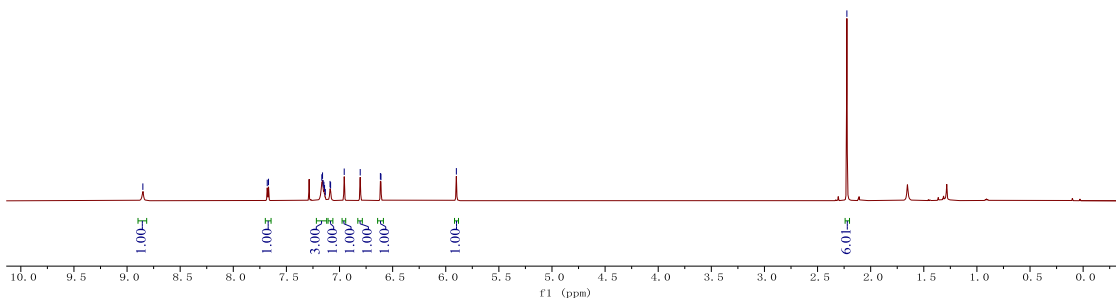

LRS-0905.2.fid

175.096  
137.038  
136.179  
132.881  
131.862  
129.112  
127.189  
124.855  
123.116  
122.089  
121.167  
120.037  
119.700  
109.698  
102.927

77.211  
77.000  
76.786  
59.315  
20.892  
16.172

| Parameter                | Value               |
|--------------------------|---------------------|
| 1 Title                  | LRS-0905.2.fid      |
| 2 Origin                 | Bruker BioSpin GmbH |
| 3 Solvent                | CDCl3               |
| 4 Temperature            | 295.0               |
| 5 Number of Scans        | 512                 |
| 6 Acquisition Date       | 2023-10-09T17:33:53 |
| 7 Spectrometer Frequency | 150.92              |
| 8 Nucleus                | 13C                 |

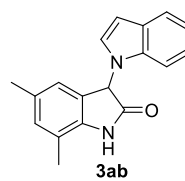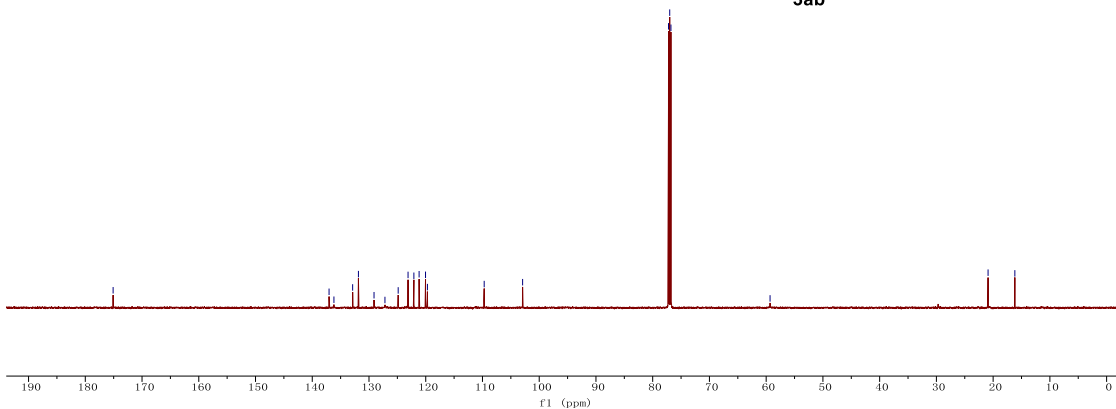

LRS-0824.1.fid

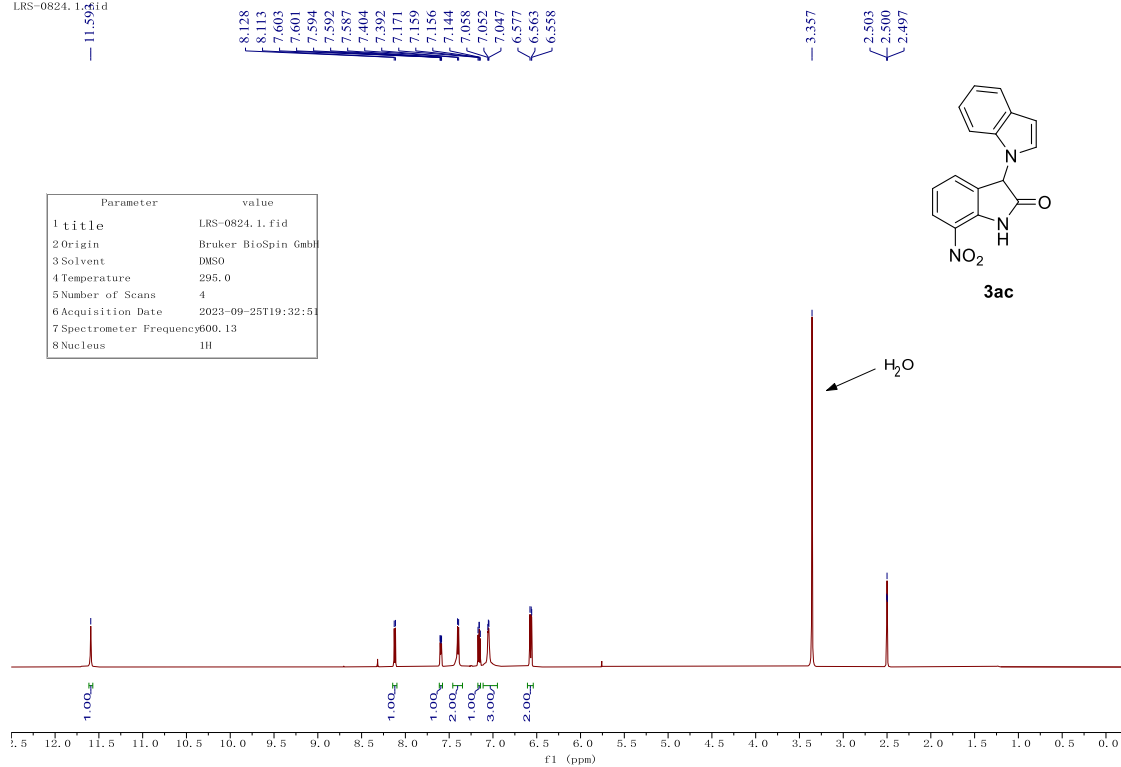

LRS-0824.2.fid

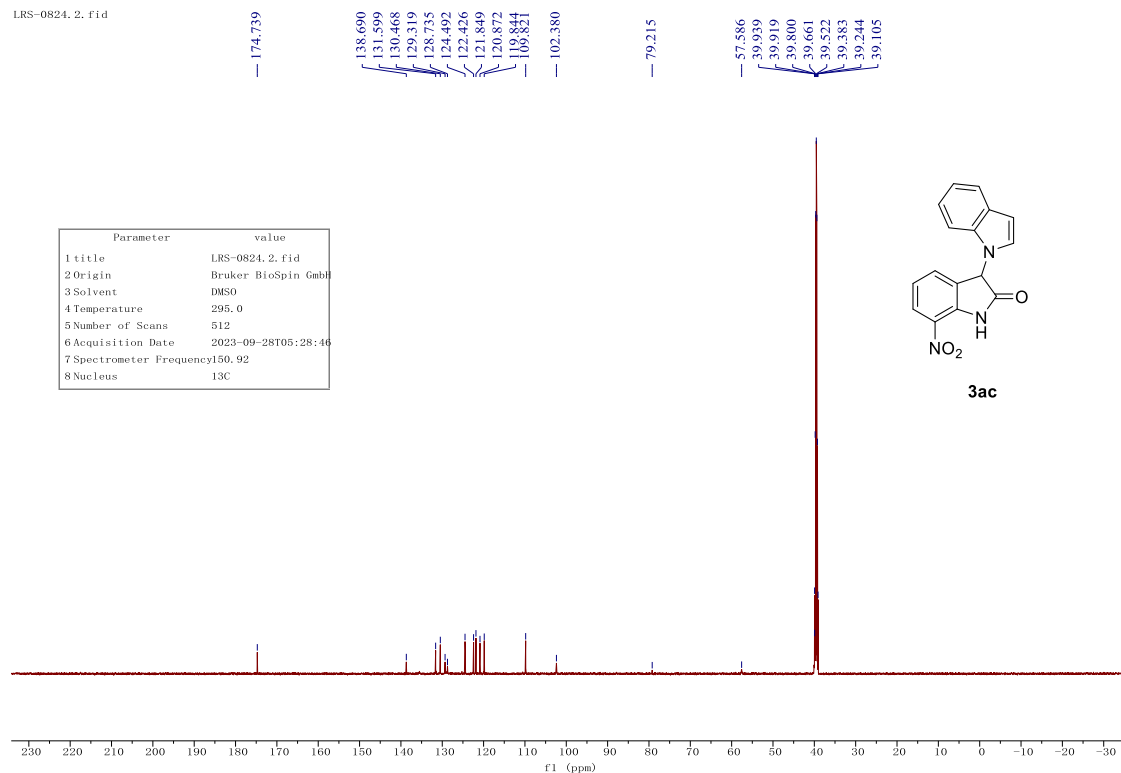

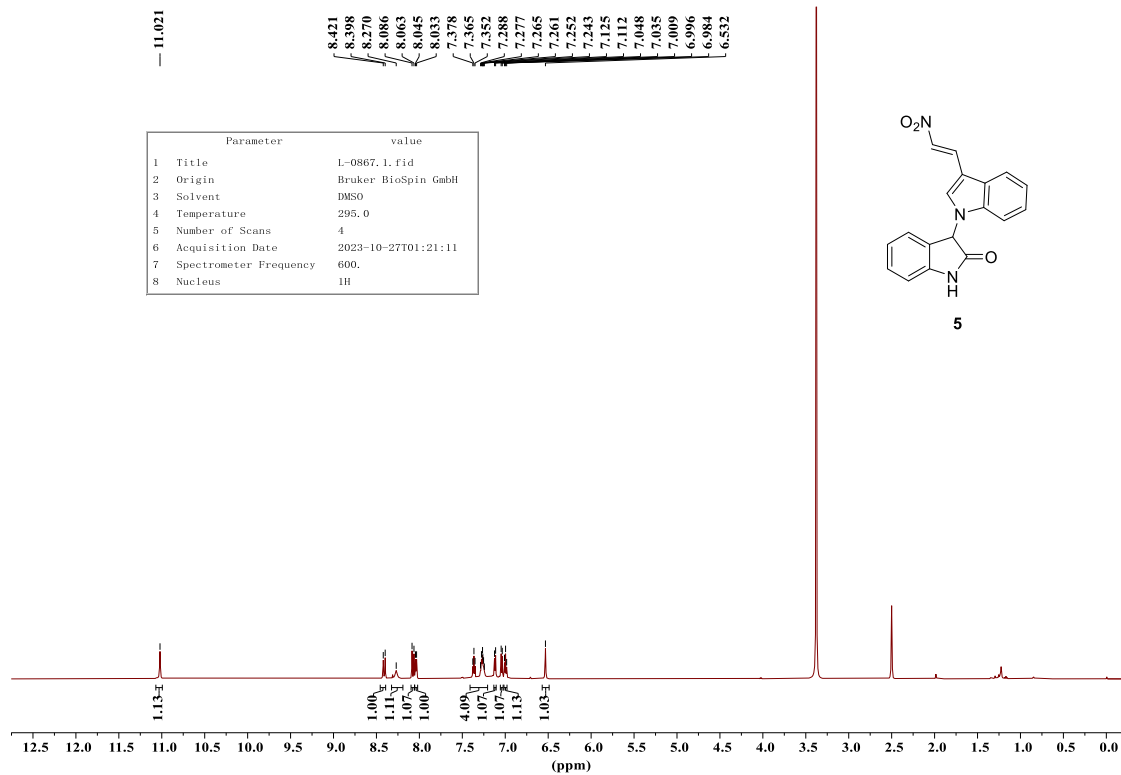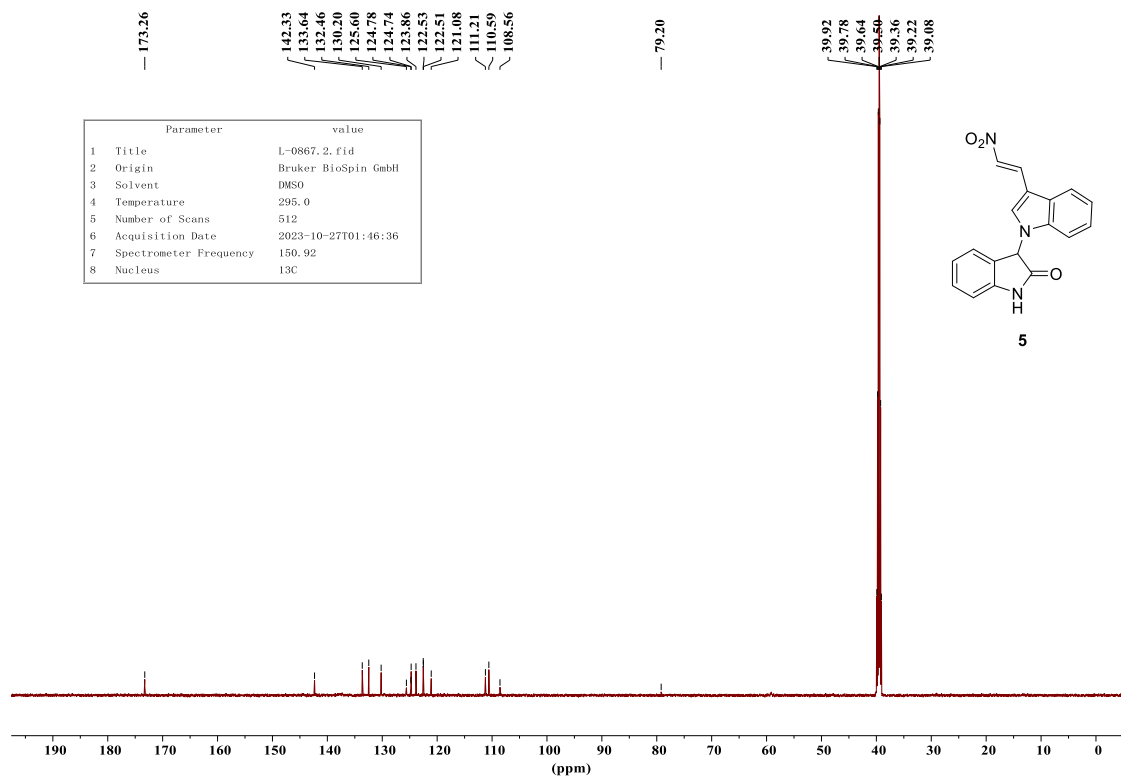

LRS-0827-3.1.fid  
 8.098  
 7.818  
 7.811  
 7.808  
 7.803  
 7.537  
 7.523  
 7.478  
 7.464  
 7.432  
 7.427  
 7.424  
 7.418  
 7.413  
 7.409  
 7.367  
 7.365  
 7.355  
 7.353  
 7.347  
 7.342  
 7.286  
 7.277  
 7.274  
 7.269  
 7.265  
 7.263  
 7.260  
 7.258  
 7.254  
 7.246  
 7.220  
 7.207  
 7.195  
 6.789  
 6.784

| Parameter                | 值                   |
|--------------------------|---------------------|
| 1 标题                     | LRS-0827-3.1.fid    |
| 2 Origin                 | Bruker BioSpin GmbH |
| 3 Solvent                | CDCl3               |
| 4 Temperature            | 295.0               |
| 5 Number of Scans        | 4                   |
| 6 Acquisition Date       | 2023-10-08T17:06:57 |
| 7 Spectrometer Frequency | 600.13              |
| 8 Nucleus                | 1H                  |

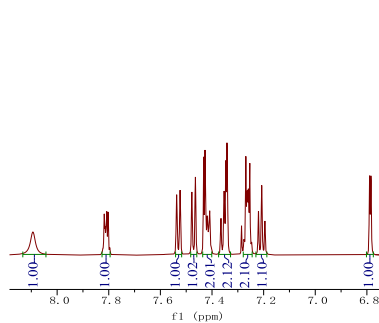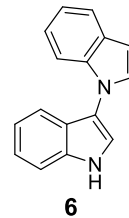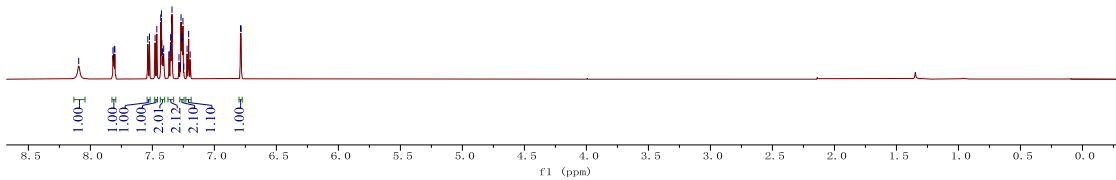

LRS-0827-3.2.fid  
 137.417  
 134.676  
 129.582  
 128.496  
 123.662  
 123.070  
 121.919  
 120.801  
 120.427  
 119.922  
 119.186  
 118.545  
 117.456  
 111.631  
 110.809  
 102.407  
 77.213  
 77.000  
 76.789

| Parameter                | value               |
|--------------------------|---------------------|
| 1 title                  | LRS-0827-3.2.fid    |
| 2 Origin                 | Bruker BioSpin GmbH |
| 3 Solvent                | CDCl3               |
| 4 Temperature            | 295.0               |
| 5 Number of Scans        | 512                 |
| 6 Acquisition Date       | 2023-10-08T17:32:12 |
| 7 Spectrometer Frequency | 150.92              |
| 8 Nucleus                | 13C                 |

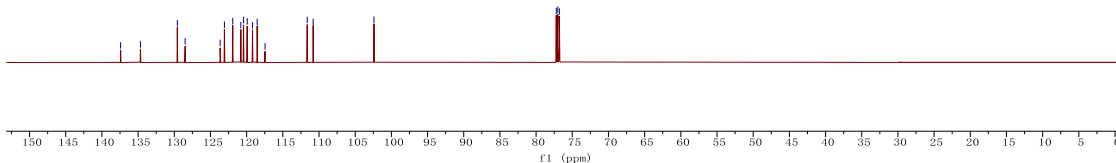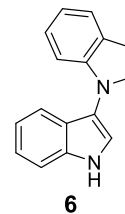

Supplement: d3ob01393f1.pdf [file d3ob01393f1.pdf]
